1 **Hamsters are a model for post-COVID-19 alveolar regeneration mechanisms:**  
2 **an opportunity to understand post-acute sequelae of SARS-CoV-2**

3  
4 Laura Heydemann<sup>1,§</sup>, Małgorzata Ciurkiewicz<sup>1,§</sup> Georg Beythien<sup>1</sup>, Kathrin Becker<sup>1</sup>,  
5 Klaus Schughart<sup>2,3</sup>, Stephanie Stanelle-Bertram<sup>4</sup>, Berfin Schaumburg<sup>4</sup>, Nancy  
6 Mounogou-Kouassi<sup>4</sup>, Sebastian Beck<sup>4</sup>, Martin Zickler<sup>4</sup>, Mark Kühnel<sup>5,6</sup>, Gülsah  
7 Gabriel<sup>4</sup>, Andreas Beineke<sup>1</sup>, Wolfgang Baumgärtner<sup>1,#</sup> and Federico Armando<sup>1,#</sup>

8  
9 <sup>1</sup> Department of Pathology, University of Veterinary Medicine, Foundation, Hannover,  
10 Germany

11 <sup>2</sup> Department of Microbiology, Immunology and Biochemistry, University of  
12 Tennessee Health Science Center, Memphis, Tennessee, USA,

13 <sup>3</sup> Institute of Virology Münster, University of Münster, Münster, Germany

14 <sup>4</sup> Department for Viral Zoonoses-One Health, Leibniz Institute for Virology, Hamburg,  
15 Germany;

16 <sup>5</sup> Institute of Pathology, Hannover Medical School (MHH), Hannover, Germany

17 <sup>6</sup> Member of the German Center for Lung Research (DZL), Biomedical Research in  
18 Endstage and Obstructive Lung Disease Hannover (BREATH), Hannover Medical  
19 School (MHH), Hannover, Germany

20 <sup>§</sup> These authors contributed equally as co-first authors

21 <sup>#</sup> These authors contributed equally as co-last authors

22

23 **Correspondence** and requests for materials should be addressed to Wolfgang

24 Baumgärtner. [Wolfgang.baumgärtner@tiho-hannover.de](mailto:Wolfgang.baumgärtner@tiho-hannover.de)

25

26 **Abstract:**

27 A relevant number of coronavirus disease 2019 (COVID-19) survivors suffers from  
28 post-acute sequelae of severe acute respiratory syndrome coronavirus 2 (PASC).

29 Current evidence suggests a dysregulated alveolar regeneration in COVID-19 as a  
30 possible explanation for respiratory PASC symptoms, a phenomenon which deserves  
31 further investigation in a suitable animal model. This study investigates

32 morphological, phenotypical and transcriptomic features of alveolar regeneration in  
33 SARS-CoV-2 infected Syrian golden hamsters. We demonstrate that CK8<sup>+</sup> alveolar  
34 differentiation intermediate (ADI) cells occur following SARS-CoV-2-induced diffuse  
35 alveolar damage. A subset of ADI cells shows nuclear accumulation of TP53 at 6-  
36 and 14-days post infection (dpi), indicating a prolonged arrest in the ADI state.

37 Transcriptome data show the expression of gene signatures driving ADI cell

38 senescence, epithelial-mesenchymal transition, and angiogenesis. Moreover, we  
39 show that multipotent CK14<sup>+</sup> airway basal cell progenitors migrate out of terminal  
40 bronchioles, aiding alveolar regeneration. At 14 dpi, presence of ADI cells,  
41 peribronchiolar proliferates, M2-type macrophages, and sub-pleural fibrosis is  
42 observed, indicating incomplete alveolar restoration. The results demonstrate that the  
43 hamster model reliably phenocopies indicators of a dysregulated alveolar  
44 regeneration of COVID-19 patients. The results provide important information on a  
45 translational COVID-19 model, which is crucial for its application in future research  
46 addressing pathomechanisms of PASC and in testing of prophylactic and therapeutic  
47 approaches for this syndrome.

48

49 **Keywords:**

50 post-acute sequelae of SARS-CoV-2 (PASC), alveolar regeneration, hamster,  
51 alveolar differentiation intermediate (ADI) cell, lung fibrosis

52

53 **Introduction**

54 Severe acute respiratory syndrome coronavirus 2 (SARS-CoV-2), caused over 600  
55 million infections and over 6.5 million fatal outcomes to this day (October 2022, WHO).  
56 Patients surviving acute COVID-19 are at risk to develop post-acute sequelae of SARS-  
57 CoV-2 (PASC) <sup>1-3</sup>. PASC occurs in 3-11.7% of infected individuals and is characterized  
58 by symptoms such as fatigue, headache, cognitive dysfunction, altered smell and taste,  
59 shortness of breath, and dyspnea, occurring >12 weeks after acute virus infection <sup>4,5</sup>. Of  
60 note, among patients with severe disease requiring hospitalization, shortness of breath  
61 or dyspnea are reported with a much higher frequency (in up to 49% and 23.3% of  
62 cases, respectively) 8-10 months after acute disease <sup>6,7</sup>. The pathomorphological  
63 correlates and mechanisms responsible for respiratory PASC are still not fully  
64 understood. Impairment of gas exchange capacity due to an incomplete or protracted  
65 regeneration of alveoli and lung fibrosis represent potential pathomechanisms <sup>8-10</sup>.  
66 SARS-CoV-2 infection of the lung causes diffuse alveolar damage (DAD), characterized  
67 by necrosis of alveolar epithelial type 1 and 2 (AT1 and AT2) cells, fibrin exudation and  
68 edema, followed by alveolar epithelial hyperplasia in later stages <sup>11,12</sup>. The healing of  
69 damaged alveoli and recovery of gas exchange capacity requires the presence of

70 progenitor cells that are able to regenerate lost AT1 cells. For a long time, it was  
71 assumed that AT1 cells are regenerated solely by proliferating and trans-differentiating  
72 AT2 cells. However, recent advances in mouse models of lung injury have shown that  
73 different airway progenitor cell types expand and mobilize to repair alveolar structures  
74 <sup>13-16</sup>. AT2 cells are mainly responsible for AT1 cell regeneration in homeostatic turnover  
75 and following mild injury, while airway progenitors are recruited after severe injury with  
76 marked AT1 cell loss <sup>15,17</sup>. The differentiation into mature AT1 cells features an  
77 intermediate step, the so-called *alveolar differentiation intermediate* (ADI) cell, first  
78 described to occur during AT2 to AT1 cell trans-differentiation <sup>18-21</sup>. ADI cells in mice are  
79 characterized by cytokeratin 8 (CK8) expression, a polygonal to elongated morphology,  
80 NFκB and TP53 activation and upregulation of genes involved in epithelial–  
81 mesenchymal transition (EMT), HIF-1α pathway, and cell cycle exit <sup>8,19</sup>. ADI cells have  
82 been observed in various lung injury models, e.g. bleomycin injury, neonatal hypoxia  
83 and hyperoxia, LPS injury and Influenza A virus infection <sup>18-20</sup>. In homeostatic turnover  
84 and mild injury, these cells occur only transiently and differentiate into mature AT1 cells  
85 eventually, thereby restoring normal alveolar structure and function <sup>19,21,22</sup>. However, a  
86 pathological accumulation of ADI cells has been observed in idiopathic pulmonary  
87 fibrosis (IPF) in humans and a mouse model for progressive fibrosis, suggesting that a  
88 blockage during trans-differentiation of ADI to AT1 cells could represent a potential  
89 regenerative defect in these conditions <sup>8,18,19,21,23</sup>. Recently, high numbers of ADI cells  
90 have also been demonstrated in lungs of COVID-19 patients. It has been postulated  
91 that persistence of these cells could be responsible for unremitting hypoxemia, edema,  
92 ventilator dependence and the fatal outcome in protracted ARDS as well as the  
93 subsequent development of fibrosis in PASC <sup>8,9,24,25</sup>. Since serial samples are rarely  
94 available in human observational studies, the fate of COVID-19 associated ADI cells  
95 remains elusive. Addressing this open question is of paramount importance to obtain a  
96 deeper understanding of the factors that contribute to the protracted recovery from  
97 COVID-19 facilitating the development of rational therapeutic approaches in the field of  
98 lung regenerative medicine. The development of a precise working hypothesis and  
99 subsequent preclinical testing of therapeutic options requires the study of sequential  
100 phases of SARS-CoV-2 infection in appropriate animal models. Among the susceptible  
101 small animal species, Syrian golden hamsters (*Mesocricetus auratus*) are well suited to  
102 study regenerative responses. They develop a distinct, but transient and non-lethal  
103 disease, in contrast to other models such as transgenic mice or ferrets <sup>26-30</sup>. The

104 regeneration of lung epithelia following SARS-CoV-2 infection has not been  
105 characterized in detail in this important animal model yet. To obtain further insights in  
106 the regenerative processes following SARS-CoV-2 infection we characterized the  
107 proliferating epithelial cells within the lung of infected hamsters in the acute and sub-  
108 acute phase of the infection until 14 days post infection. Our study shows that CK8<sup>+</sup>ADI  
109 cells and multipotent CK14<sup>+</sup> airway basal cells participate in alveolar regeneration and  
110 that persistence of ADI cells at 14 dpi is associated with fibrosis in SARS-CoV-2  
111 infected hamsters. In addition our study provides a hamster-specific marker gene lists  
112 for different alveolar cell populations, including AT1, ADI and AT2 cells. Altogether, the  
113 results provide important information on a translational COVID-19 model, which is  
114 crucial for its application in future research addressing pathomechanisms of PASC and  
115 for testing of prophylactic and therapeutic approaches for this syndrome.

116

## 117 **Results**

### 118 **1. SARS-CoV-2 induced epithelial proliferative responses and inflammation** 119 **persist beyond virus clearance**

120 First, successful infection was confirmed by immunohistochemistry for SARS-CoV-2  
121 nucleoprotein (NP) antigen in lung tissue. Viral antigen was found in alveolar and  
122 bronchial epithelia as well as in macrophages (**Fig. 1A**), as described previously<sup>31</sup>.  
123 Quantification of immunolabeled cells in whole lung sections peaked at 3 dpi,  
124 followed by a sharp decline at 6 dpi and virus clearance at 14 dpi (**Fig. 1A**). No  
125 SARS-CoV-2<sup>+</sup> cells were detected in mock-infected animals at any time point.  
126 Histologically, SARS-CoV-2 infected animals showed a marked, transient, broncho-  
127 interstitial pneumonia, as described previously<sup>31-34</sup>. The lesions were characterized  
128 by DAD with epithelial cell degeneration and necrosis, sloughing of alveolar cells,  
129 fibrin exudation and heterophilic and histiocytic infiltrates. Some mock-infected  
130 animals showed small foci of mild, multifocal, interstitial inflammation composed of  
131 heterophils and macrophages, particularly at 1 dpi. The extent of inflammation in  
132 SARS-CoV-2 and mock infected animals was quantified in total lung sections using  
133 whole slide digital image analysis of Iba-1 immunolabeling. The number of Iba-1<sup>+</sup>  
134 cells was significantly higher in SARS-CoV-2 infected animals compared to the mock  
135 group at 1, 3, and 6, with a notable peak at 6 dpi (**Fig. 1B**).

136 The inflammatory lesions in SARS-CoV-2 infected hamsters were accompanied by a  
137 prominent epithelial proliferation (**Fig. 1C**). At 3 dpi, small foci of hyperplastic  
138 epithelial cells were observed within alveoli in single animals, affecting up to 1.3% of  
139 the examined lung area (**Fig. 1C**). At 6 dpi, large areas of prominent epithelial cell  
140 proliferation were found in all infected animals, affecting 9.3% to 39.3% of the  
141 examined lung area (**Fig. 1C**). Proliferating epithelial cells within the alveoli were  
142 characterized by variable morphologies, including a round cell shape typical of AT2  
143 cells and a more polygonal to sometimes elongated shape resembling ADI cells.  
144 Surrounding terminal bronchioles, a proliferation of cuboidal airway epithelial cells  
145 forming pods, ribbons and tubules was observed. In the periphery, these peri-  
146 bronchiolar proliferates merged with areas of alveolar epithelial hyperplasia, showing  
147 a transition from a cuboidal to a polygonal shape (**Fig. 1C**). Many cells showed  
148 atypical features such as cyto- and karyomegaly, bizarrely shaped and euchromatic  
149 nuclei, as well as abundant, partly atypical, mitotic figures (**Fig. 1C**). At 14 dpi,  
150 multifocal areas of epithelial proliferates were still observed, affecting 2.1% to 7.2% of  
151 the examined lung area, often around terminal airways (**Fig. 1C**). In addition, a  
152 majority of animals (7 out of 9) showed foci of sub-pleural fibrosis.

153 In summary, SARS-CoV-2-infected hamsters showed a prominent and  
154 heterogeneous epithelial proliferative response that was still recognizable at 14 dpi,  
155 beyond virus clearance. Next, we wanted to demonstrate that alveolar AT2 cells  
156 proliferate, mobilize and differentiate into AT1 cells through the ADI cell state and that  
157 airway-derived progenitors participate in alveolar regeneration, possibly through a  
158 transitional AT2 or ADI cell state, in the Syrian golden hamster.

159

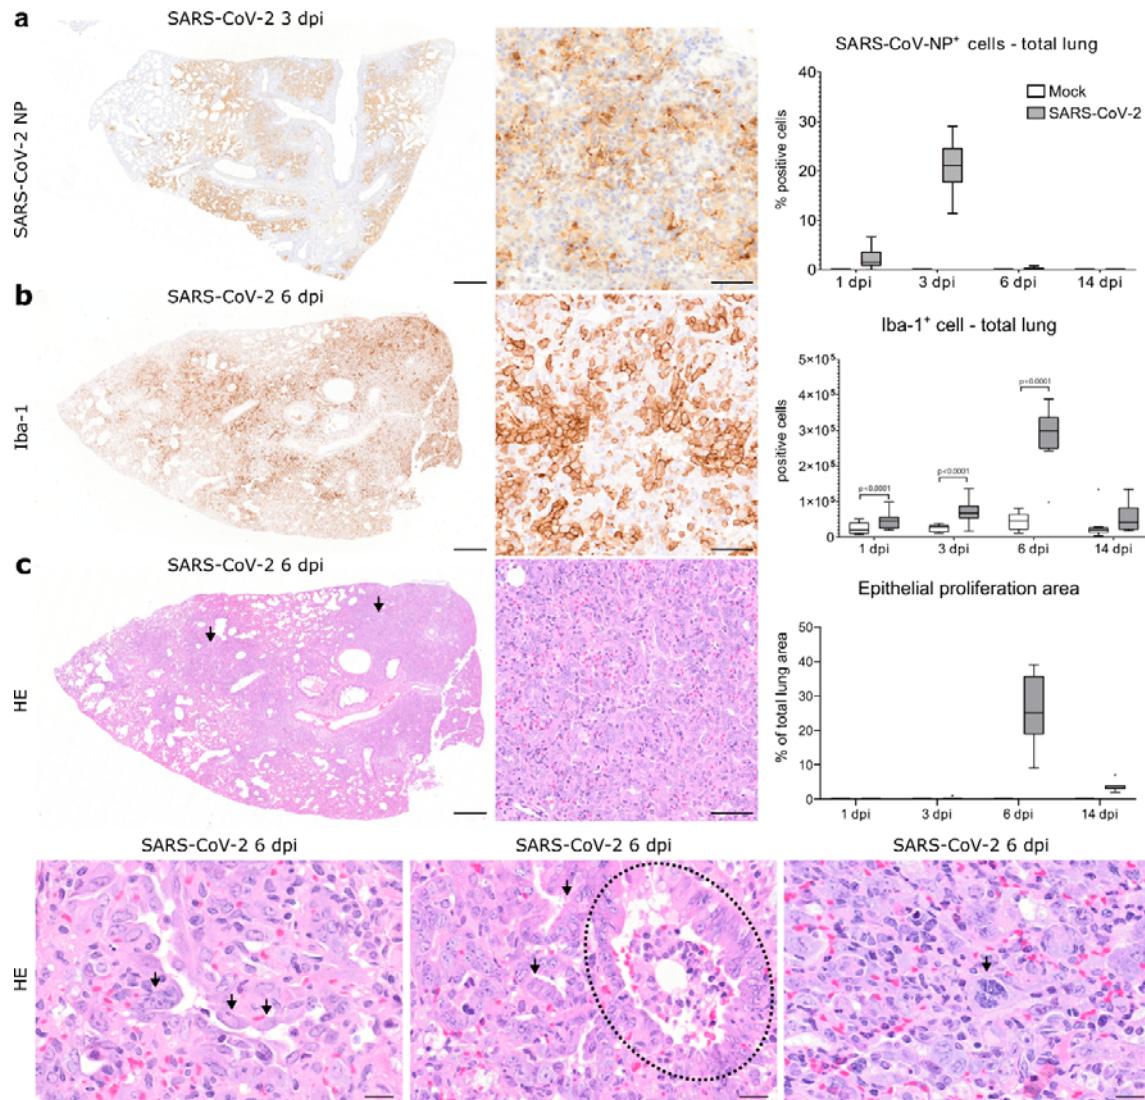

160

161 **Figure 1. SARS-CoV-2 infection causes a marked epithelial proliferative**  
 162 **response in the hamster lung.**

163 **A** Representative images showing SARS-CoV-2 nucleoprotein (NP) immunolabeling  
 164 in one right lung lobe of an infected hamster at 3 days post infection (dpi). The left  
 165 panel shows an overview of one right lung lobe and the central panel displays a  
 166 higher magnification of viral antigen (brown signal) in the alveoli. Quantification of  
 167 SARS-CoV-2 NP<sup>+</sup> cells is shown in the right panel. **B** Representative images showing  
 168 ionized calcium-binding adapter molecule 1 (Iba-1) immunolabeling in one right lung  
 169 lobe of an infected hamster at 6 dpi. The left panel shows an overview of one right  
 170 lung lobe and the central panel display a higher magnification of  
 171 macrophages/histiocytic cells (brown signal) in the affected alveoli. Quantification of  
 172 Iba-1<sup>+</sup> macrophages/histiocytes is shown in the right panel. **C** Representative images  
 173 showing histopathological lesions in a lung lobe of a SARS-CoV-2 infected hamster  
 174 at 6 dpi. The top left panel shows an overview of one right lung lobe displaying large  
 175 areas of alveolar consolidation (arrows). The top central panel shows a higher  
 176 magnification of an affected region, which shows a prominent epithelial proliferation.  
 177 The quantification of epithelial proliferation is reported in the top right panel. The  
 178 percentage of affected area relative to total lung area is given. The bottom left panel

179 shows strings of plump polygonal or elongated cells lining alveolar septa (arrows).  
180 The bottom central panel shows proliferation of cuboidal airway epithelial cells  
181 forming ribbons and tubules (arrows) surrounding terminal bronchioles (dotted line).  
182 The bottom right panel shows that within alveolar proliferation foci, there are cells  
183 displaying karyomegaly and atypical mitotic figures (arrow). Data are shown as box  
184 and whisker plots. Data from Iba-1 quantification was tested by two-tailed Mann-  
185 Whitney-U test. A p-value of  $\leq 0.05$  was considered significant.  $N = 10$   
186 animals/group for mock and SARS-CoV-2 respectively. For quantifications, 1  
187 longitudinal section containing all right lung lobes were evaluated. Source data will be  
188 provided as a source data file. Scale bars: 500  $\mu\text{m}$  (overviews in a-c), 50  $\mu\text{m}$  (high  
189 magnifications in a-c), 20  $\mu\text{m}$  (high magnifications in lower panel in c).

190

191

192

193

194

195

196

197

198

199

200

201

202

203

204

205

206

207 **2. CK8<sup>+</sup> ADI cells frequently express TP53 and persist until 14 dpi following**  
208 **SARS-CoV-2 induced DAD in hamsters**

209 ADI cells are reported to originate from AT2 and/or a particular subset of club cells  
210 expressing MHC-II<sup>19</sup>. The AT2 to ADI cell trans-differentiation process is  
211 characterized by gradual down-regulation of AT2 cell markers, expression of CK8  
212 and cell cycle exit markers, as well as a morphologic transition from a round to a  
213 polygonal to elongated shape<sup>19,20</sup>. In the following, we focused on the first part of this  
214 AT2-ADI-AT1 trajectory (**Fig. 2A**).

215 First, we detected proSP-C<sup>+</sup> AT2 and CK8<sup>+</sup> ADI cells using immunohistochemistry.  
216 Quantification was performed within total alveoli first, followed by a separate analysis  
217 in areas showing inflammation and/or epithelial proliferation (termed “affected  
218 alveoli”) and histologically unremarkable alveoli (termed “non-affected alveoli”).  
219 proSP-C expression was detected in cells with a round shape lining alveolar septa. In  
220 mock-infected animals, the number of proSP-C<sup>+</sup> cells was constant at all investigated  
221 time-points (**Fig. 2B**). In SARS-CoV-2 infected animals, the total number of proSP-C<sup>+</sup>  
222 cells increased significantly at 6 dpi, which was caused by an increase within affected  
223 alveoli. proSP-C<sup>+</sup> cells were found in small groups within inflammatory foci (**Fig. 2B**).  
224 Scattered proSP-C<sup>+</sup> cells were observed in close proximity of terminal bronchioles.  
225 Interestingly, the majority of cells within the epithelial proliferates at 6 dpi were  
226 proSP-C<sup>-</sup>.

227 CK8 was ubiquitously expressed in the apical cytoplasm of luminal cells within  
228 bronchi, bronchioles and terminal bronchioles in all animals. In the alveoli of mock-  
229 infected animals, rare elongated CK8<sup>+</sup> cells were observed, making up less than 1%  
230 of total alveolar cells. In SARS-CoV-2 infected animals however, CK8 was  
231 abundantly expressed within the epithelial proliferative foci at 3, 6 and 14 dpi and the  
232 number of CK8<sup>+</sup> cells in total alveoli was significantly increased compared to the  
233 mock group (**Fig. 2C**). Importantly, increased numbers of CK8<sup>+</sup> cells were detected  
234 within affected and non-affected alveoli. Within affected alveoli, the relative numbers  
235 of CK8<sup>+</sup> cells remained constantly elevated throughout the investigation period. CK8<sup>+</sup>  
236 cells displayed a variable cell morphology including round, polygonal, as well as  
237 elongated shapes with thin cytoplasmic processes (**Fig. 2C**).



238 Double-labeling for proSP-C and CK8 demonstrated AT2 to ADI cell transition. At 3  
239 dpi, numerous proSP-C<sup>+</sup>CK8<sup>-</sup> cells and rare proSP-C<sup>+</sup>CK8<sup>+</sup> cells with a round AT2  
240 cell morphology were observed within affected alveoli (Supplem. Fig. 1A), whereas  
241 proSP-C<sup>-</sup>CK8<sup>+</sup> elongated cells were very rare. At 6 dpi, affected alveoli contained  
242 occasional proSP-C<sup>+</sup>CK8<sup>-</sup> and proSP-C<sup>+</sup>CK8<sup>+</sup> round cells (**Fig. 2D**). These cells were  
243 intermingled with high numbers of proSP-C<sup>-</sup>CK8<sup>+</sup> cells, which showed various  
244 morphologies ranging from round AT2-type to polygonal ADI-type cells as well as  
245 bizarre, irregularly shaped cells with karyomegaly. Moreover, elongated proSP-C<sup>-</sup>  
246 CK8<sup>+</sup> cells with AT1-type morphology were occasionally observed (Supplem. Fig.  
247 1B). At 14 dpi, numerous proSP-C<sup>+</sup>CK8<sup>+</sup> cells with AT2 morphology as well as  
248 occasional proSP-C<sup>-</sup>CK8<sup>+</sup> polygonal cells were still detected in alveoli, including  
249 morphologically non-affected alveoli (Supplem. Fig. 1C).

250 Once AT2 cells enter the ADI state, they exit the cell cycle to allow AT1 trans-  
251 differentiation<sup>8,21</sup>. At 6 and 14 dpi, CK8<sup>+</sup> cells in SARS-CoV-2 infected animals  
252 expressed nuclear TP53, indicative of cell cycle arrest and DNA repair (**Fig. 2E**)  
253 (Supplem. Fig. 2A-B). TP53 expression was particularly frequent in polygonal, large,  
254 bizarre, occasionally bi-nucleated cells (Supplem. Fig. 2A-B). Of note, no TP53  
255 expression was observed in the rare CK8<sup>+</sup> cells in the alveoli of mock-infected  
256 animals. Our findings demonstrated that the transition between AT2 and ADI cells in  
257 SARS-CoV-2 infected hamsters features: i) transient co-expression of proSP-C and  
258 CK8, ii) changes in cell morphology from round to elongated as well as iii) expression  
259 of cell cycle arrest markers.

260 In functional regeneration, ADI cells transdifferentiate into mature AT1, which assume  
261 an elongated morphology with thin cytoplasmic processes required for adequate gas  
262 exchange. In the following, we focused on the last part of this AT2-ADI-AT1  
263 trajectory. Double-labeling with AT1 cell markers described for human and mouse  
264 (AGER, AQP5, PDPN) was not possible since the tested antibodies failed to  
265 specifically label AT1 cells in the hamster (*data not shown*). For this reason, we  
266 performed transmission electron microscopy to demonstrate ADI to AT1 cell  
267 transition. In normal conditions, AT1 cells are characterized by a flattened  
268 morphology with slender processes containing a moderately electron-dense,  
269 organelle-poor cytoplasm and a round to oval nucleus with a moderate amount of  
270 peripheral heterochromatin<sup>35,36</sup>. AT2 cells are characterized by a round morphology,

271 an apico-basal polarity and a moderately electron-dense cytoplasm rich in rough  
272 endoplasmic reticulum and free ribosomes. In addition, AT2 cells possess apical  
273 microvilli as well as membrane-bound vesicles containing multiple concentric  
274 membrane layers (multi-lamellar bodies)<sup>35,36</sup>. In SARS-CoV-2 infected animals,  
275 proliferative foci at 6 dpi contained numerous AT2 cells (Supplem. Fig. 3A) as well as  
276 numerous hypertrophic epithelial cells with a variable cell morphology resembling ADI  
277 cells (Supplem. Fig. 3B; Supplem. Fig. 4 A-B). Most importantly, cells sharing AT1  
278 and AT2 cell features were observed in the alveolar lining at the edges of proliferative  
279 foci. The cells showed the flattened and elongated morphology of AT1 cells, but also  
280 characteristics of AT2 cells, such as microvilli on the cell surface (**Fig. 2F**; Supplem.  
281 Fig. 3C-D). Similar ultrastructural findings were present in COVID-19 patients<sup>37</sup>. The  
282 present findings demonstrate that the last part of the AT2-ADI-AT1 trajectory also  
283 occurs in SARS-CoV-2 infected hamsters.

284 Finally, we sought to confirm that the ADI cells detected in the hamster share  
285 features with ADI cells in COVID-19 patients. For this, we used lung samples  
286 obtained from three patients with lethal COVID-19 ARDS. In addition, a fourth lung  
287 sample obtained from a lobectomy of a non-COVID case was used. Histologically,  
288 the lungs from all lethal COVID-19 ARDS cases showed features of moderate to  
289 severe, acute DAD, characterized by necrosis and sloughing of alveolar cells, fibrin  
290 exudation, hyaline membranes, alveolar edema and mild to moderate neutrophilic  
291 infiltrates (**Fig. 3A**). In the non-COVID-19 sample, a suppurative bronchopneumonia  
292 was diagnosed, characterized by neutrophilic and histiocytic infiltrates in bronchioles  
293 and alveolar lumina (**Fig. 3A**). Immunolabeling showed the presence of round proSP-  
294 C<sup>+</sup>CK8<sup>+</sup> cells and polygonal to elongated proSP-C<sup>-</sup>CK8<sup>+</sup> cells, representing the  
295 different stages of ADI cells, in all lethal COVID-19 ARDS samples as well as the  
296 non-COVID-19 bronchopneumonia sample (**Fig. 3B**). Interestingly, CK8<sup>+</sup> ADI cells  
297 expressing TP53 were only detected the three lethal COVID-19 ARDS samples,  
298 while no TP53 co-expression was detected in the ADI cells of the non-COVID-19  
299 case (**Fig. 3C**).

300 In conclusion, ADI cells are a feature of alveolar regeneration following SARS-CoV-2  
301 induced DAD in lethal COVID-19 and its Syrian golden hamster model. These cells  
302 were also detected in low numbers under non-infectious conditions in the hamster  
303 and in a human sample with suppurative bronchopneumonia, confirming that ADI

304 cells participate in physiological turnover and alveolar repair regardless of the  
 305 etiology in both species. Importantly, only ADI cells from SARS-CoV-2 infected  
 306 hamsters and humans expressed TP53, hinting at a prolonged block of these cells in  
 307 the intermediate state.

308

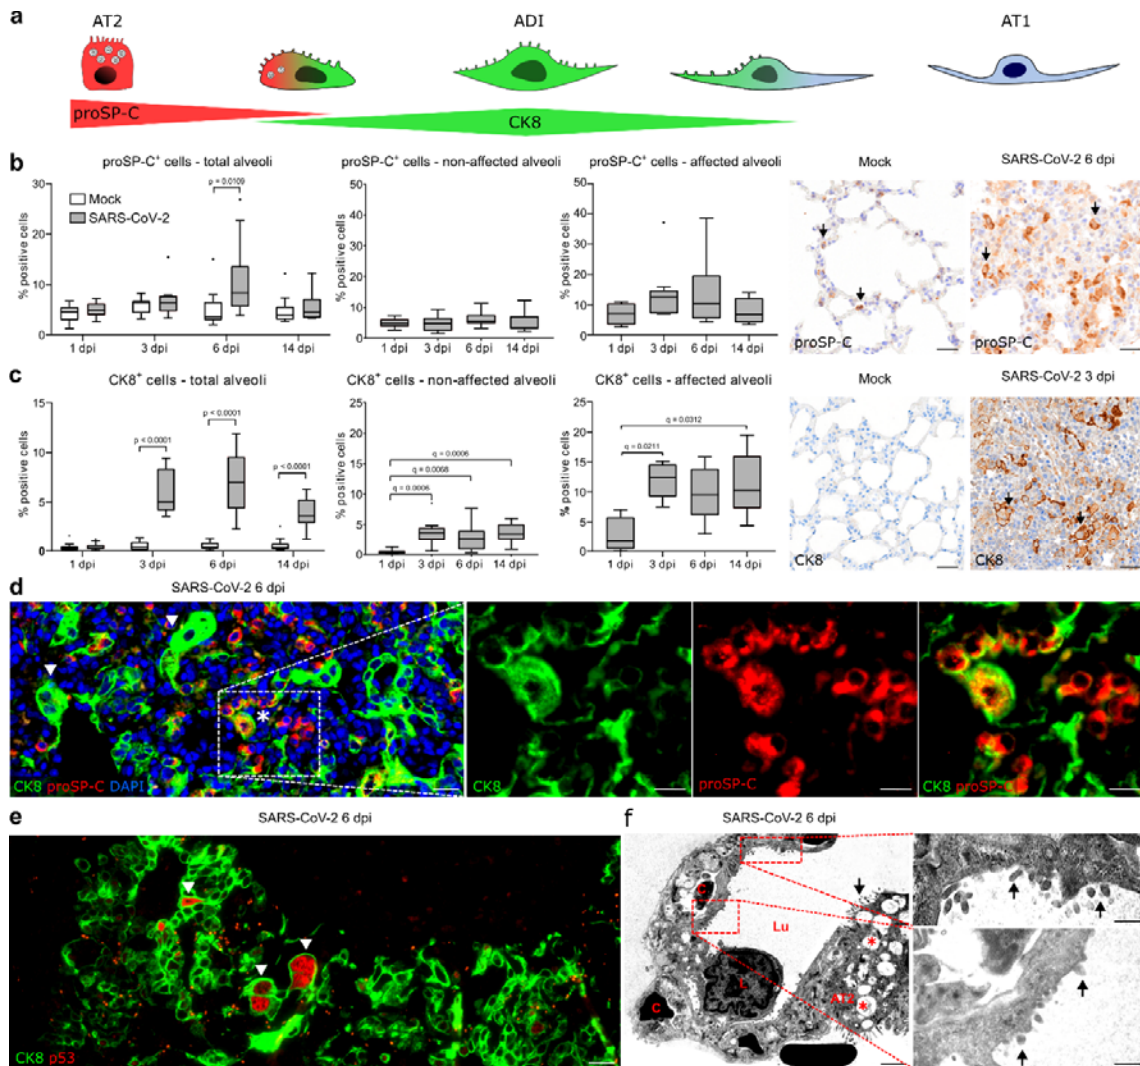

309

310 **Figure 2: Alveolar differentiation intermediate (ADI) cells in SARS-CoV-2**  
 311 **infected hamsters.**

312 **A** Schematic illustration of the trans-differentiation process from alveolar  
 313 pneumocytes type 2 (AT2) to alveolar pneumocytes type 1 (AT1), as demonstrated  
 314 below in the hamster. The AT2 to ADI cell trans-differentiation process is  
 315 characterized by a decrease of pro surfactant protein-C (proSP-C) expression,  
 316 increase of cytokeratin 8 (CK8) expression as well as a morphologic transition from a  
 317 round to polygonal to elongated shape (see D). The ultrastructural hallmark of the  
 318 ADI to AT1 trans-differentiation is the presence of cells with an elongated AT1  
 319 morphology and AT2 features, such as apical microvilli (see F). **B, C** Quantification of

320 proSP-C<sup>+</sup> AT2 cells (B) and CK8<sup>+</sup> ADI cells (C) within total alveoli, non-affected  
321 alveoli, and affected alveoli as well as representative pictures of immunolabelling  
322 (brown signal, arrows) in the alveoli of mock and SARS-CoV-2 infected hamsters. **D**  
323 Representative double immunofluorescence image of an alveolar proliferation focus  
324 in a SARS-CoV-2 infected hamster at 6 dpi. Cells are labelled with CK8 (green) and  
325 proSP-C (red). An overview and higher magnification of the area delineated by a  
326 rectangle are shown. There are numerous proSP-C<sup>-</sup>CK8<sup>+</sup>ADI cells, some showing  
327 hypertrophy and elongated cytoplasmic processes (arrowheads) and single proSP-  
328 C<sup>+</sup>CK8<sup>+</sup> cells (asterisk) with a round morphology. **E** Representative double  
329 immunofluorescence of an alveolar proliferation focus in a SARS-CoV-2 infected  
330 hamster at 6 dpi. Cells are labelled with CK8 (green) and cell cycle exit marker TP53  
331 (red). The arrowheads shows polygonal, large, bizarre TP53<sup>+</sup> ADI cells. **F**  
332 Representative transmission electron microscopy (TEM) micrograph showing alveoli  
333 of a SARS-CoV-2 infected hamster at 6 dpi. A basement membrane separates AT1  
334 cells from the endothelial cells lining capillary spaces (C) containing erythrocytes. A  
335 leukocyte (L) as well as an AT2 cell (AT2) with apical microvilli (arrow) and numerous  
336 intracytoplasmic multi-lamellar bodies (red asterisks) are also seen. Red boxes and  
337 high magnification show cells with flattened and elongated morphology of AT1 cells,  
338 with characteristics of AT2 cells, such as microvilli (arrows). Quantification data are  
339 shown as box and whisker plots. Statistical analysis was performed by two-tailed  
340 Mann-Whitney-U test. For multiple comparisons between time points, a Benjamini-  
341 Hochberg correction was applied. P- and q-values ≤0.05 were considered significant.  
342 N□=□10 animals/group for mock and SARS-CoV-2 respectively. For quantifications,  
343 1 longitudinal section containing all right lung lobes were evaluated. Source data will  
344 be provided as a source data file. Scale bars: 25 μm (b, c), 20 μm (overview in d, e),  
345 10 μm (high magnification in d), 2000 nm (low magnification in f), 500 nm (high  
346 magnification in f).

347

348

349

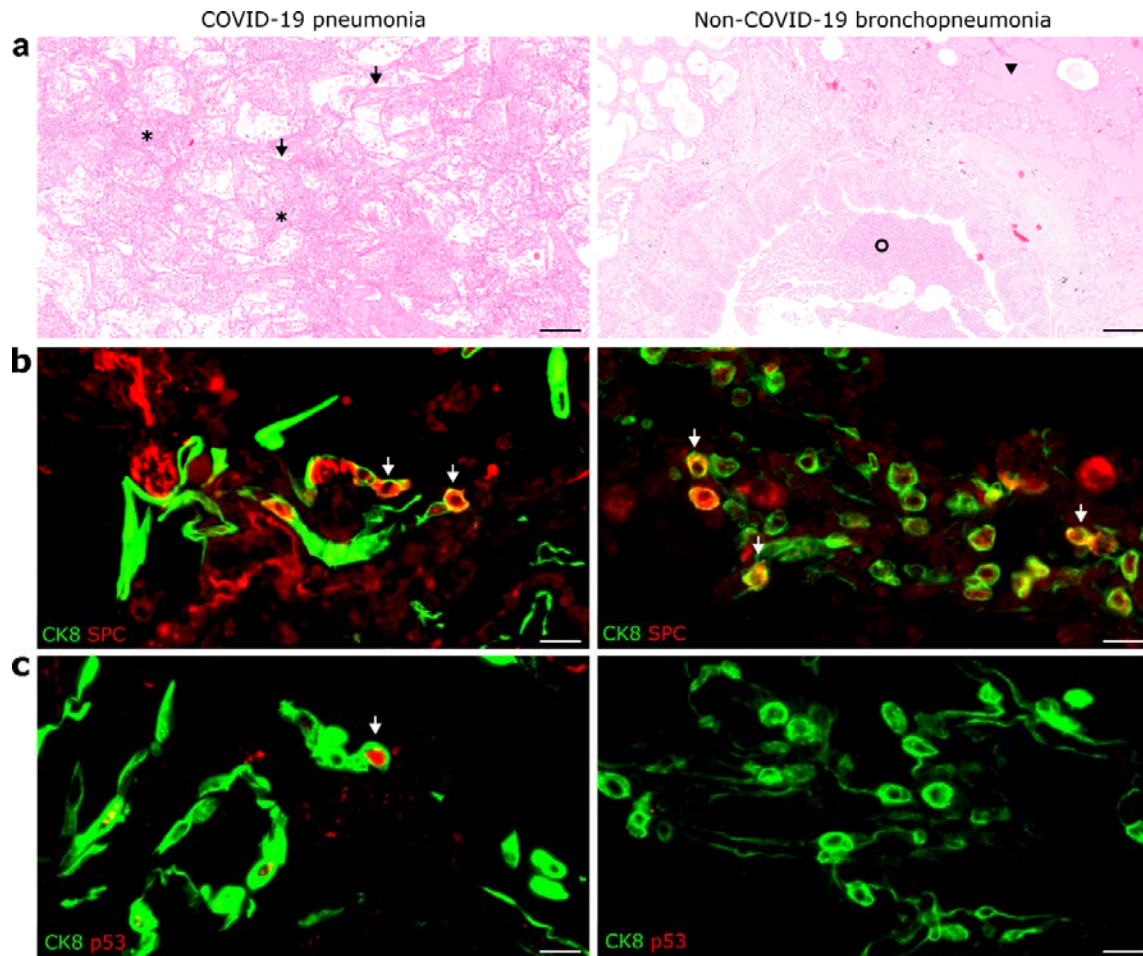

350

351 **Figure 3: Alveolar differentiation intermediate (ADI) cells in COVID-19 and non-**  
352 **COVID-19 pneumonia.**

353 **A** Representative images showing histopathological lesions in a COVID-19 patient  
354 (left) and in non-COVID-19 bronchopneumonia case (right). COVID-19 is  
355 characterized by diffuse alveolar damage (DAD) with hyaline membranes (arrows)  
356 and alveolar spaces filled with sloughed epithelial cells, leukocytes and edema  
357 (asterisks). Non-COVID-19 bronchopneumonia was characterized by intraluminal  
358 suppurative exudate (circle) and alveolar edema (arrowhead) without DAD. **B**  
359 Representative image of double immunofluorescence for the ADI marker CK8 (green)  
360 and the AT2 marker proSP-C (red) in a COVID-19 (left) and non-COVID-19  
361 bronchopneumonia (right) sample. Cells with a round morphology express both  
362 markers (arrows). **C** Representative image of double immunofluorescence for the ADI  
363 marker CK8 (green) and the cell cycle exit marker TP53 (red) in a COVID-19 (left)  
364 and a non-COVID-19 bronchopneumonia (right) sample. ADI cells in COVID-19  
365 patients express TP53(arrow), while ADI cells in the non-COVID-19  
366 bronchopneumonia case are negative. Scale bars: 200  $\mu$ m and 20  $\mu$ m (b, c).

367

368

369 **3. Multipotent airway-derived CK14<sup>+</sup> progenitors contribute to alveolar**  
370 **regeneration following SARS-CoV-2 induced DAD in hamsters**

371 It is well accepted that upon severe alveolar injury, both AT1 and AT2 cells can be  
372 replenished by airway progenitors (**Fig. 4 A**)<sup>15,17,38-40</sup>. In the next step, we  
373 characterized the contribution of airway progenitors to alveolar regeneration in  
374 SARS-CoV-2 infected hamsters. As described earlier, histopathological lesions at 6  
375 and 14 dpi included foci of prominent alveolar epithelial proliferation with airway-like  
376 morphology that were frequently in anatomic continuity with bronchiolar-alveolar  
377 junctions. Thus, we determined 1) the cellular origin of these proliferates and 2)  
378 whether these progenitors differentiate into AT2 or ADI cells after migrating into the  
379 alveoli.

380 Multiple airway progenitor cell types have been reported to contribute to alveolar  
381 regeneration, including proSP-C<sup>+</sup>SCGB1A1<sup>+</sup> broncho-alveolar stem cells (BASCs),  
382  $\Delta$ NP63<sup>+</sup>CK5<sup>+</sup> distal alveolar stem cells (DASCs),  $\Delta$ NP63<sup>+</sup>CK5<sup>+</sup>CK14<sup>+</sup> basal cells, and  
383 SCGB1A1<sup>+</sup> club cells<sup>40-42</sup>. First, our aim was to identify these cell types in the distal  
384 airways of hamsters. The predominant basal cell type was CK14<sup>+</sup>, followed by  
385 CK14<sup>+</sup> $\Delta$ NP63<sup>+</sup> cells (Suppl fig 5).  $\Delta$ NP63<sup>+</sup>CK5<sup>+</sup>CK14<sup>+</sup> cells were rare in the distal  
386 airways (Suppl fig 5). We did not detect  $\Delta$ NP63<sup>+</sup>CK5<sup>+</sup> DASCs, CK5<sup>+</sup> cells or  
387 SPC<sup>+</sup>SCGB1A1<sup>+</sup> BASCs in the distal airways of hamsters (*data not shown*). In  
388 addition to basal cell types, SCGB1A1<sup>+</sup> club cells were detected in high numbers in  
389 distal airways.

390 In the peri-bronchiolar proliferation foci of SARS-CoV-2 infected animals at 6 dpi, the  
391 majority of cells were CK14<sup>+</sup>, while CK14<sup>+</sup> $\Delta$ NP63<sup>+</sup> cells were rare (Supplem. Fig. 6).  
392 CK5<sup>+</sup>, CK5<sup>+</sup> $\Delta$ NP63<sup>+</sup> or CK14<sup>+</sup>CK5<sup>+</sup> cells were not detected within these areas  
393 (Supplem. Fig. 6). SCGB1A1 expression was absent in the peri-bronchiolar  
394 proliferates at 6 dpi, but abundantly present at 14 dpi. Therefore, we focused our  
395 further quantitative analysis on CK14<sup>+</sup> airway basal cells and SCGB1A1<sup>+</sup>club cells.

396 In mock-infected hamsters, the number of CK14<sup>+</sup> cells in the airways remained  
397 unchanged over the observation period (**Fig. 4 B**). SARS-CoV-2 infection caused a  
398 marked proliferation of CK14<sup>+</sup> cells in the airways, which peaked at 6 dpi and  
399 remained elevated until 14 dpi. The number of CK14<sup>+</sup> cells in total alveoli was  
400 significantly increased compared to the mock group at 3, 6 and 14 dpi, mirroring the

401 increase in the airways (**Fig. 4 B**). CK14 was expressed by the majority of cells in the  
402 peri-bronchiolar proliferation forming pods and tubules continuous with terminal  
403 bronchioles at 6 dpi. At 14 dpi, the peri-bronchiolar proliferates were only partly  
404 CK14<sup>+</sup> (**Fig. 4 B**).

405 In contrast to the CK14<sup>+</sup> progenitors, we observed no major contribution of club cells  
406 in the alveolar proliferative response during early infection (**Fig. 4 C**). The number of  
407 SCGBA1<sup>+</sup> club cells in the airways remained similar in mock-infected animals at all  
408 time-points. In SARS-CoV-2 infected animals, the number of SCGBA1<sup>+</sup> cells in the  
409 airways was mildly increased compared to mock at 6 dpi (**Fig. 4 C**). SCGBA1 was  
410 not expressed in alveolar proliferation areas at 3 and 6 dpi. Interestingly, SCGBA1<sup>+</sup>  
411 cells significantly increased in the alveoli of SARS-CoV-2 infected animals at 14 dpi.  
412 The expression was limited to the airway-like, peri-bronchiolar proliferation areas, in  
413 which up to 40% of cells were SCGBA1<sup>+</sup> club cells (**Fig. 4 C**).

414 Therefore, it was concluded that CK14<sup>+</sup> cells are the airway progenitors that mainly  
415 contribute to alveolar regeneration in SARS-CoV-2 infected hamsters. These cells  
416 probably have their origin in a common  $\Delta$ NP63<sup>+</sup>CK5<sup>+</sup>CK14<sup>+</sup> basal cell pool, but  
417 represent a subset that loses CK5 and partly  $\Delta$ NP63 expression upon migration into  
418 the alveoli.

419 Next, we determined the fate of the CK14<sup>+</sup> cells in the alveoli. Double-labeling with  
420 proSP-C revealed clusters of CK14<sup>+</sup>proSP-C<sup>+</sup> cells in the peri-bronchiolar pods and  
421 occasionally within the lining of terminal bronchioles. This indicates a potential  
422 differentiation of airway progenitors towards the AT2 lineage (**Fig. 4 D**; Supplem. Fig.  
423 7 A-B). At the edges of the peri-bronchiolar proliferates, some CK14<sup>+</sup> cells showed a  
424 transition from a cuboidal to an elongated shape typical of ADI cells. Co-staining with  
425 CK8 showed a gradual phenotypical change in the direction of alveoli. Cells exiting  
426 the bronchiole showed a cuboidal morphology and a diffuse cytoplasmic CK14  
427 expression. Towards alveoli, the cuboidal cells co-expressed CK14 and CK8. More  
428 distally, cells became more elongated and were characterized by CK14<sup>-</sup>CK8<sup>+</sup>  
429 immunolabeling (**Fig. 4 E**; Supplem. Fig. 7 C-D). Therefore, we concluded that  
430 airway progenitors can differentiate into AT2 but also directly into the ADI state.  
431 These transitions were mainly observed at 6 dpi. In contrast, at 14 dpi, peri-  
432 bronchiolar CK14<sup>+</sup> cells partly co-expressed SCGBA1, indicating a club cell  
433 differentiation (**Fig. 4 F**; Supplem. Fig. 7 E-F). Hence, we concluded that the

434 increased number of alveolar SCGB1A1<sup>+</sup> cells we observed at this time point was  
435 most likely the result of *in situ* differentiation of CK14<sup>+</sup> cells. However, we cannot  
436 exclude that SCGB1A1<sup>+</sup> club cells also proliferated and migrated out of the  
437 bronchioles to give rise to alveolar cells at 14 dpi.

438 In summary, our findings indicate that multipotent CK14<sup>+</sup> airway basal cell  
439 progenitors, probably arising from a CK14<sup>+</sup>CK5<sup>+</sup>ΔNP63<sup>+</sup> basal cell pool, proliferate  
440 and migrate to alveoli following SARS-CoV-2 induced DAD in hamsters. These cells  
441 have the potential to differentiate into distinct lineages, including AT2, ADI and club  
442 cells, depending on the timing and localization.

443



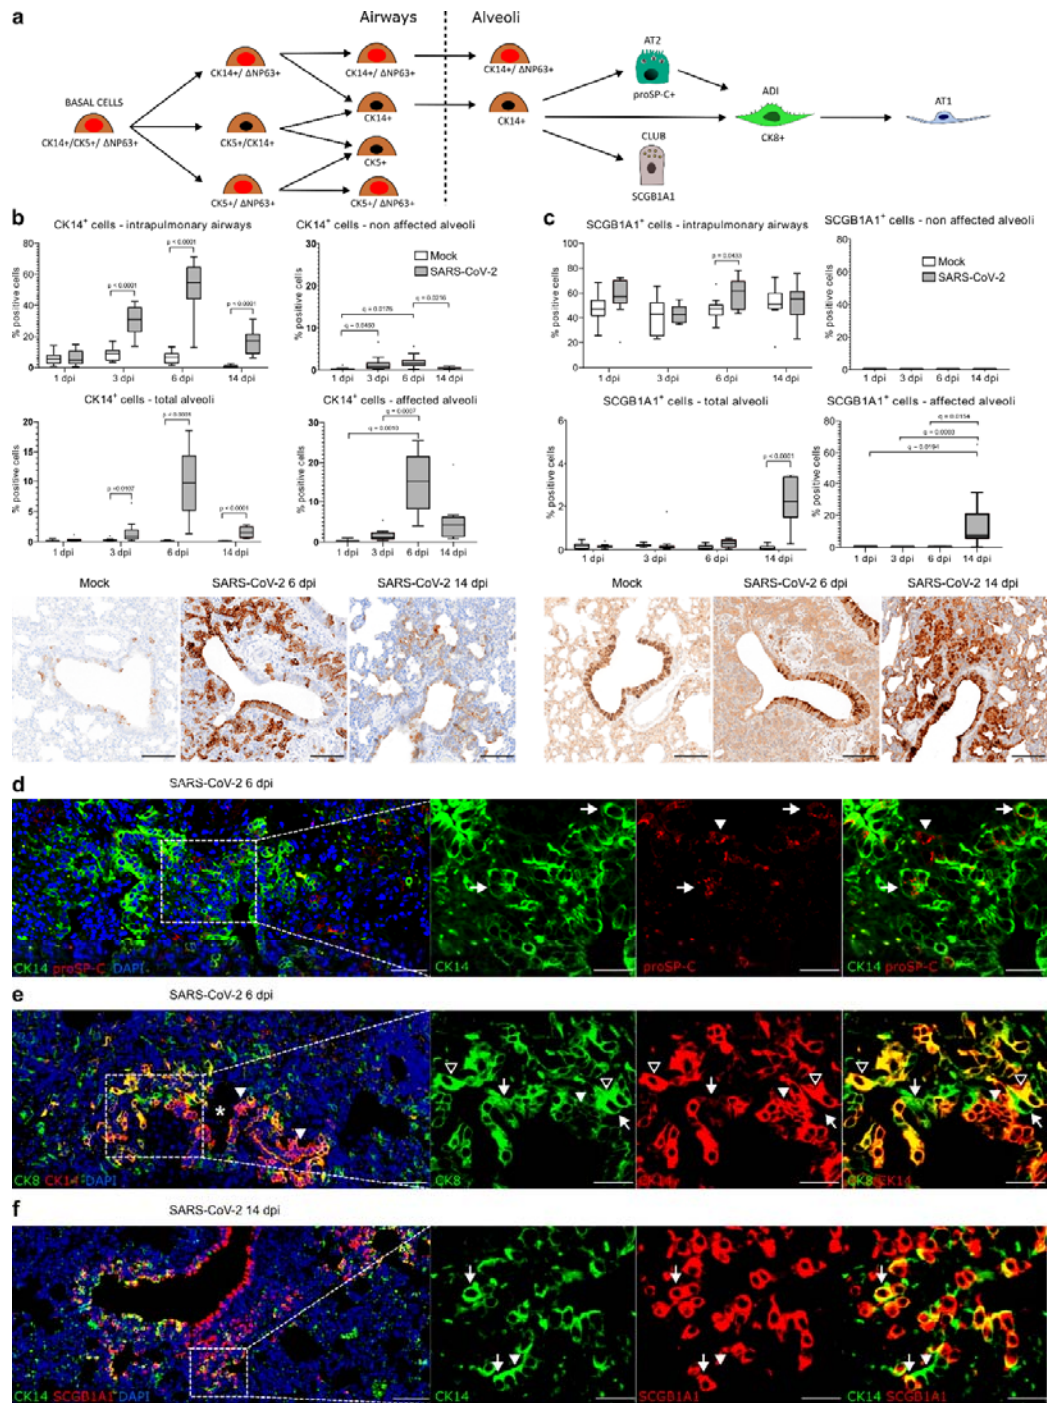

444

445 **Figure 4: Airway basal cells participate in alveolar regeneration in SARS-CoV-2**  
 446 **infected hamsters.**

447 **A** Schematic illustration of the proposed trajectory of airway basal cells towards  
 448 alveolar cells. CK14<sup>+</sup>CK5<sup>+</sup>ΔNP63<sup>+</sup> basal cells proliferate within the airways and give  
 449 rise to different combinations of CK5<sup>+</sup>, CK14<sup>+</sup>, ΔNp63<sup>+</sup> progenitor cells (see also  
 450 supplementary Fig. 5). Upon severe alveolar damage, rare ΔNp63<sup>+</sup>CK14<sup>+</sup> and  
 451 frequent CK14<sup>+</sup> basal cells mobilize to the alveoli giving rise to alveolar pneumocytes  
 452 type 2 (AT2, see D) and/or to alveolar differentiation intermediate (ADI) cells (see E),  
 453 particularly at 6 dpi. At 14 dpi, CK14<sup>+</sup> basal cells give rise to secretoglobin 1A1<sup>+</sup>

454 (SCGB1A1) club cells within the peribronchiolar alveolar proliferates (see F). **B, C**  
455 Quantification of CK14<sup>+</sup> basal cells (B) and SCGB1A1<sup>+</sup> club cells (C) within  
456 intrapulmonary airways, total alveoli, non-affected alveoli, and affected alveoli as well  
457 as representative pictures of immunolabeled cells (brown signal) in the bronchioles  
458 and peribronchiolar proliferates in mock and SARS-CoV-2 infected hamsters at 6 and  
459 14 dpi. The percentage of the immunolabelled cells relative to total cells in the  
460 respective area is given. Pictures of SARS-CoV-2 infected hamsters at 6 and 14 dpi  
461 are taken from the same location for CK14 and SCGB1A1 immunolabelings. **D**  
462 Representative image of double immunofluorescence for CK14 (green) and proSP-C  
463 (red) in a peribronchiolar proliferation area in a SARS-CoV-2 infected hamster at 6  
464 dpi. An overview and higher magnification of the area delineated by a rectangle are  
465 shown. The arrowhead shows a proSP-C<sup>+</sup> AT2 cell. The arrows indicate double  
466 labeled airway progenitors differentiating into proSP-C<sup>+</sup> AT2 cells. **E** Representative  
467 image of double immunofluorescence for CK14 (red) and CK8 (green) in a  
468 peribronchiolar proliferation area in a SARS-CoV-2 infected hamster at 6 dpi. An  
469 overview and higher magnification of the area delineated by a rectangle are shown.  
470 The image shows a transition from CK14<sup>+</sup> airway basal cells forming a pod (white  
471 arrowhead), to double labeled CK14<sup>+</sup>CK8<sup>+</sup> cells differentiating into elongated ADI  
472 cells (open arrowheads) and CK14<sup>-</sup>CK8<sup>+</sup>, elongated ADI cells (arrows). **F**  
473 Representative image of double immunofluorescence for CK14 (green) and  
474 SCGB1A1 (red) in a peribronchiolar proliferation area in a SARS-CoV-2 infected  
475 hamster at 14 dpi. An overview and higher magnification of the area delineated by a  
476 rectangle are shown. A transition from CK14<sup>+</sup> airway basal cells (arrowhead) to  
477 CK14<sup>+</sup>SCGB1A1<sup>+</sup> club cells (arrows) is shown. Quantification data are shown as box  
478 and whisker plots. Statistical analysis was performed by two-tailed Mann-Whitney-U  
479 test. For multiple comparisons between time points, a Benjamini–Hochberg  
480 correction was applied. P- and q-values  $\leq 0.05$  were considered significant. N = 10  
481 animals/group for mock and SARS-CoV-2 respectively. For quantifications, 1  
482 longitudinal section containing all right lung lobes were evaluated. Source data will be  
483 provided as a source data file. Scale bars: 100  $\mu\text{m}$  (c, d), 50  $\mu\text{m}$  (overview in d, e, f),  
484 25  $\mu\text{m}$  (high magnification in d, e, f).

485

486

487

488

489

490

491

492

493

494       **4. Hamsters show dysregulated alveolar regeneration and fibrosis**  
495               **following SARS-CoV-2 induced DAD**

496 SARS-CoV-2 NP antigen was no longer detectable in the lung at 6 dpi. However, ADI  
497 cells and airway progenitors were still present in the alveoli at 14 dpi, indicating an  
498 ongoing regeneration processes with incomplete restoration of alveolar structures at  
499 this time-point. Moreover, 7 out of 9 animals showed multifocal, sub-pleural, variably  
500 sized, well demarcated areas with aggregates of spindle cells and abundant, pale,  
501 fibrillary, extracellular material (**Fig. 5 A**). Azan staining confirmed deposition of  
502 collagen in these areas (**Fig. 5 B**). Immunohistochemistry for  $\alpha$ -smooth muscle actin  
503 ( $\alpha$ -SMA) demonstrated the presence of myofibroblasts (**Fig. 5 C**). The fibrotic areas  
504 encompassed from 0.59 to 2.35 % of the evaluated lung tissue area (**Fig. 5 E**). Next,  
505 we wanted to determine if ADI cells and fibrosis at 14 dpi are locally associated with  
506 M2-polarized macrophages in hamsters. CD204<sup>+</sup> M2-type macrophages were  
507 frequently detected within and around fibrotic areas (**Fig. 5 D**). The number of  
508 CD204<sup>+</sup> cells was significantly higher in SARS-CoV-2 infected animals compared to  
509 the mock group at 3, 6 and 14 dpi (**Fig. 5 F**).

510 In summary, the findings revealed an incomplete restoration of alveolar structures  
511 with ADI cells and M2-type macrophages, as well as sub-pleural fibrosis, still  
512 detectable two weeks after infection.

513

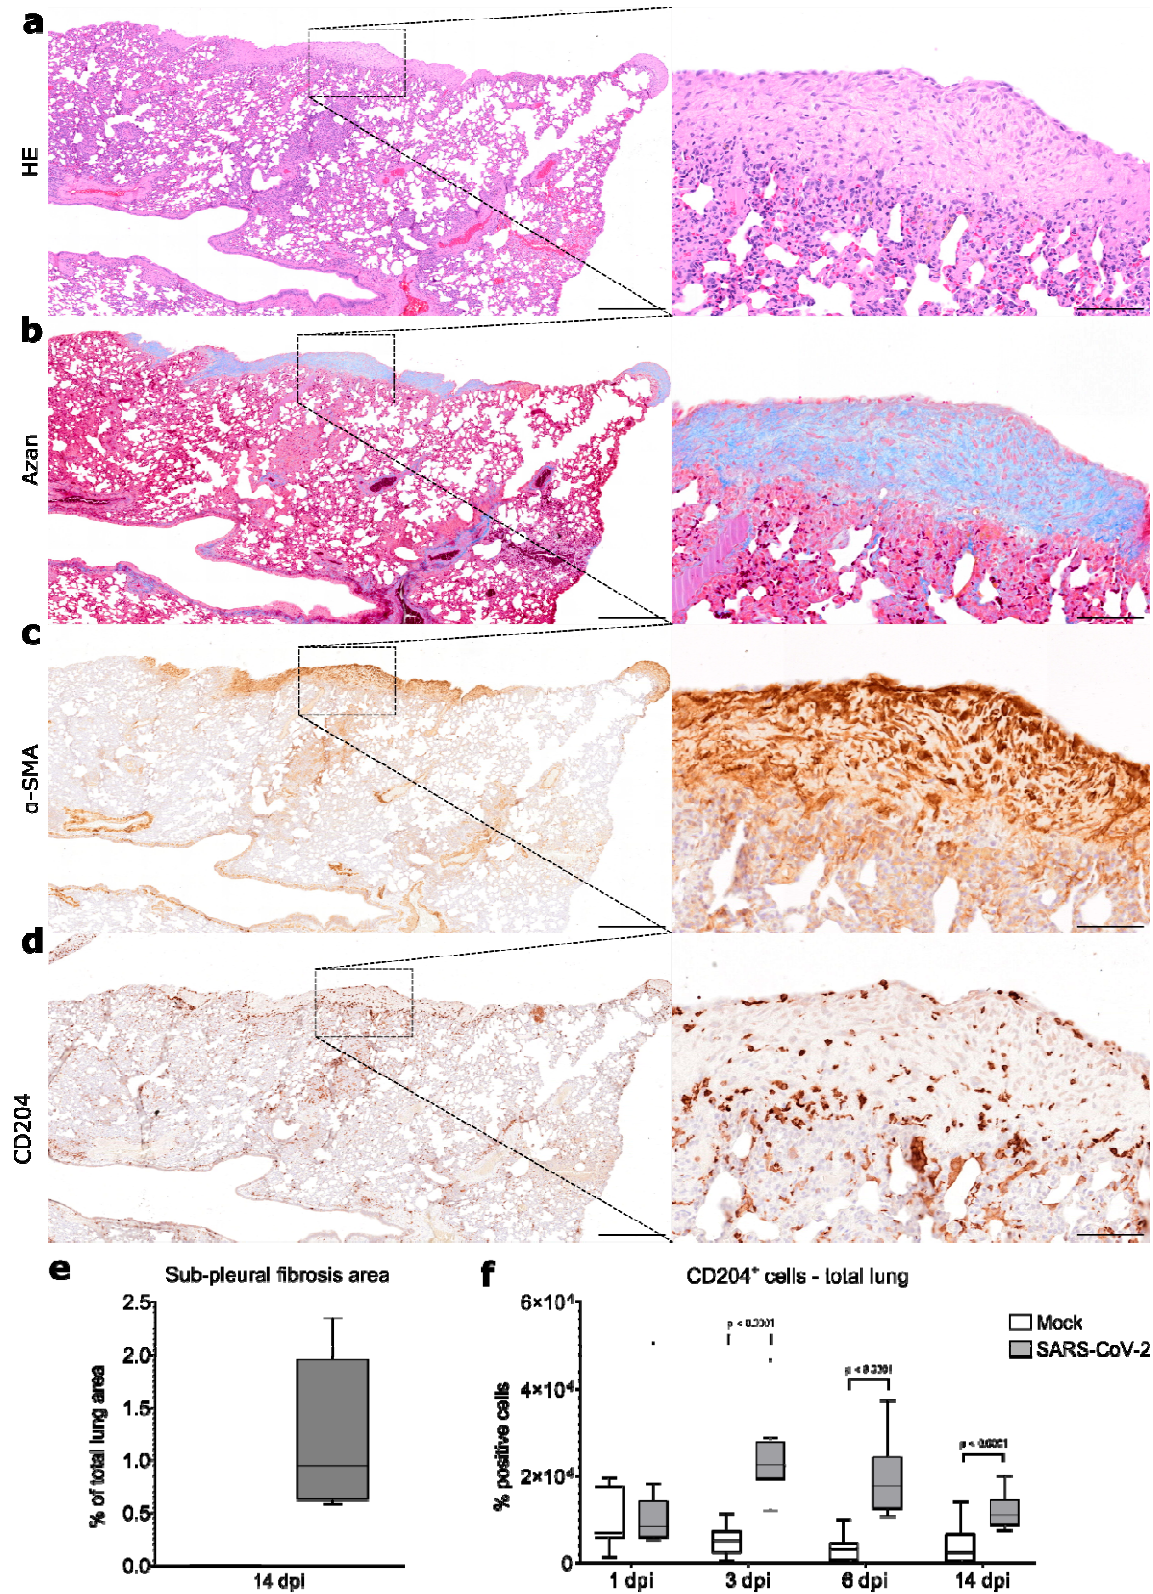

514

515

**Figure 5: Sub-pleural fibrosis in SARS-CoV-2 infected hamsters.**

516

517

518

**A-D** Representative images showing sub-pleural fibrotic foci in a lung lobe of a SARS-CoV-2 infected hamster at 14 dpi. The left panel shows an overview of one right lung lobe displaying multifocal, extensive, well demarcated areas of sub-pleural

519 fibrosis. The right panel shows at higher magnification of the area delineated by the  
520 rectangle. On hematoxylin-eosin (HE) stained sections, this lesion is characterized by  
521 sub-pleural aggregates of spindle cells and abundant, pale eosinophilic, fibrillary,  
522 extracellular matrix (A). Azan stain demonstrates the presence of mature collagen  
523 fibers in the matrix (blue signal, B). Immunohistochemistry shows abundant  $\alpha$ -smooth  
524 muscle actin ( $\alpha$ -SMA)<sup>+</sup> myofibroblasts (brown signal in C) as well as infiltration with  
525 CD204<sup>+</sup> M2 macrophages (brown signal, D). **E** Quantification of sub-pleural fibrosis in  
526 lungs of mock and SARS-CoV-2infected hamsters at 14 dpi. The percentage of  
527 affected area relative to total lung area is given. **F** Quantification of CD204<sup>+</sup> M2  
528 macrophages in total lung area. Data are shown as box and whisker plots. Data from  
529 CD204 quantification was tested by two-tailed Mann-Whitney-U test. A p-value of  
530  $\leq 0.05$  was chosen as the cut-off for statistical significance. N = 10 animals/group  
531 for mock and SARS-CoV-2 respectively. For quantifications, 1 longitudinal section  
532 containing all right lung lobes were evaluated. Source data will be provided as a  
533 source data file. Scale bars (a-d): 500  $\mu$ m (overview in a-d), 100  $\mu$ m (high  
534 magnification in a-d).

535

536

537

538

539

540

541

542

543

544

545

546

547

548

549

550 **5. Single-cell transcriptome analysis confirms ADI cell persistence**  
551 **following SARS-CoV-2 induced DAD in hamsters**

552 As described above, we demonstrated that ADI cells with features previously  
553 described in mouse models of lung regeneration as well as in COVID-19 patients are  
554 participating in alveolar regeneration following SARS-CoV-2 infection of hamsters. To  
555 confirm this observation with data from an independent experiment, we re-analyzed a  
556 previously published single-cell RNASeq dataset (GSE162208) generated in SARS-  
557 CoV-2 infected Syrian golden hamsters<sup>43</sup>. The experiment was performed with a  
558 study design similar to the present investigation. We focused our analysis on data  
559 from SARS-CoV-2-infected animals sacrificed at 5 and 14 dpi. First, we generated a  
560 Uniform Manifold Approximation and Projection (UMAP) clustering all cell populations  
561 detected in the datasets. We then identified alveolar cells based on the expression of  
562 AT1 and AT2 markers (*Rtkn2* and *Lamp3*, respectively), as described in the original  
563 publication (**Fig. 6 A, G**)<sup>43</sup>. These cells were re-clustered according to differences in  
564 gene expression, resulting in 7 and 11 clusters at 5 and 14 dpi, respectively. Next, we  
565 determined the top 10 differentially expressed genes (DEGs) in each cluster and  
566 compared the sets of DEGs with gene signatures described in mouse models of lung  
567 regeneration<sup>19,20</sup> as well as COVID-19 patients<sup>9</sup>. Within the DEGs, we detected  
568 genes typically expressed by AT1, AT2, ADI cells, club cells or ciliated cells in mice  
569 and/or humans, and we generated lists of candidate marker genes for these cell  
570 types in the hamster. Next, we evaluated the expression of these candidate markers  
571 within the clusters and removed genes with low specificity from the lists. The final,  
572 hamster-specific marker gene lists are given in supplementary table 1. The module  
573 scores of the respective marker sets at 5 and 14 dpi are visualized in **Fig. 6 B-F; H-L**.

574 At 5 dpi, the AT1 marker *Rtkn2* was expressed in a small number of cells in clusters  
575 2 and 6 (**Fig. 6 A**). The AT2 marker *Lamp3* was mostly expressed in many cells  
576 within a separate cell population, comprised of clusters 0, 1, 3, 4 and 5. Interestingly,  
577 *Lamp3* was also detected in some cells within cluster 2, indicating a mixed  
578 composition of this cluster (**Fig. 6 A**). Many cells did not express any one of the two  
579 genes. Applying the module scores algorithm with sets of multiple marker genes  
580 allowed a distinction of mature and transitional alveolar cell types. Mature AT1  
581 marker genes scored high in cluster 6 and partly in cluster 2, in line with the  
582 distribution of *Rtkn2* expression (**Fig. 6 B**). Mature AT2 genes showed positive

583 scores in clusters 0, 1, 3, 4 and 5 (**Fig. 6 C**), but not within the AT1 clusters. Positive  
584 scores for ADI marker genes were detected throughout clusters 2 and 6 and partly in  
585 cluster 5 (**Fig. 6 D**). Importantly, high scores were observed in the cells that did not  
586 score for markers of mature AT1 and AT2 cells. Interestingly, clusters showing high  
587 expression of AT2 genes also partly showed high scores for club cell genes (cluster  
588 1, and 3, **Fig. 6 E**). A group of cells within cluster 5 only scored high for club cell  
589 genes (**Fig 6 E**). A few cells within cluster 1 scored high exclusively for gene markers  
590 of ciliated cells (**Fig. 6 F**).

591 At 14 dpi, the AT1 marker *Rtn2* was expressed in clusters 0, 2, 3, 5, 7 and 9. The  
592 number of *Rtn2*-positive cells was higher compared to 5 dpi. Similar to 5 dpi, *Lamp3*  
593 was expressed in a separate population (clusters 1, 4, 6, and 8) and also partly within  
594 the AT1 cell clusters (**Fig. 6 G**). Again, many cells were negative for both genes.  
595 Module scores for AT1 genes were high only in three clusters expressing *Rtn2* (2, 5  
596 and 7, **Fig. 6 H**). AT2 genes scored high in 4 clusters (1, 4, 6 and 8, **Fig 6 I**).  
597 Interestingly, the majority of cells within three clusters (0, 3 and 9) showed no positive  
598 scores for either AT1 or AT2 gene sets, but scored high for ADI marker genes (**Fig 6**  
599 **J**). The number of cells with high scores for ADI cell genes was higher compared to 5  
600 dpi. Similar to 5 dpi, a positive score for club cell genes was detected within AT2  
601 clusters (cluster 6 and 8, **Fig. 6 K**). In addition, a positive score for club cells genes  
602 was observed in some cells within one of the ADI cell clusters (cluster 3). Cluster 10  
603 separated completely from the other populations and showed a high score for ciliated  
604 cell markers (**Fig. 6 L**).

605 Taken together, transcriptome analysis identified AT1, AT2 and ADI cells in SARS-  
606 CoV-2-infected hamsters. At 5 dpi, ADI cells did not form a separate cluster, but were  
607 admixed with AT1 and AT2 cells. At 14 dpi, ADI cells were more numerous and  
608 clustered separately from AT1 and AT2 cells. Moreover, we found small groups of  
609 ciliated cells admixed within the alveolar cell populations and partial expression of  
610 club cell genes within ADI and AT2 cells.

611 Next, we wanted to investigate the expression of genes belonging to pathways  
612 involved in lung regeneration and we performed module score analysis with hallmark  
613 gene lists (<http://www.gsea-msigdb.org/gsea/msigdb/index.jsp>): *p53 pathway*, *DNA*  
614 *repair*, *TGF beta signaling*, *notch signaling*, *wnt beta catenin signaling*, *epithelial*  
615 *mesenchymal transition (EMT)*, and *angiogenesis*. As described above, ADI cells in

616 mice and humans express Tp53 and other markers of cell cycle arrest and DNA  
617 repair. The transcriptome data showed that a fraction of cells with an ADI signature  
618 showed high positive scores for *p53 pathway* genes at 5 and 14 dpi (**Fig 7 A,B**). At 5  
619 dpi, almost all clusters showed positive scores for *DNA repair* genes, with the highest  
620 scores observed in AT1/ADI and cells with a ciliated cell signature (**Fig 7 C**). At 14  
621 dpi, mainly AT1/ADI and ADI clusters displayed positive scores (**Fig. 7 D**). The AT2-  
622 ADI-AT1 trajectory is regulated by different signaling pathways, including TGF beta -,  
623 notch - and wnt beta catenin signaling and involves the EMT process <sup>19,44</sup>. At 5 and  
624 14 dpi, only a few cells with ADI signature showed high positive scores for *TGF beta*  
625 *signaling* (**Fig. 7 E-F**). A minimal number of AT2 cells revealed a high positive score  
626 for *notch signaling* hallmark genes at 5 dpi, whereas variably positive scores were  
627 distributed within AT2, ADI and AT1/ADI cells at 14 dpi (**Fig. 7 G-H**). A small number  
628 of cells within the AT1/ADI cluster revealed high positive scores for *wnt beta catenin*  
629 *signaling* hallmark genes at 5 dpi (**Fig. 7 I**). At 14 dpi, larger numbers of cells within  
630 AT1/ADI and ADI clusters as well as a small number of cells within the AT2 clusters  
631 showed positive scores for *wnt beta catenin signaling* hallmark genes (**Fig. 7 J**).  
632 AT1/ADI clusters as well as cells with an ADI signature within the AT2 clusters  
633 showed a high positive score for *EMT* hallmark genes at 5 dpi (**Fig. 7 K**). At 14 dpi,  
634 some AT1/ADI cells showed positive scores for *EMT* hallmark genes (**Fig. 7 L**).  
635 Finally, we investigated the expression of genes involved in angiogenesis, since this  
636 process is upregulated in late phases of DAD, in the context of fibrosis <sup>45</sup>. A small  
637 number of cells within the AT1/ADI cluster at 5 dpi and a higher number of cells  
638 within the AT1/ADI and ADI clusters at 14 dpi revealed high positive scores for  
639 *angiogenesis* hallmark genes (**Fig. 7 M-N**).

640 In summary, the findings from the independent study confirmed that ADI cells are a  
641 feature of alveolar regeneration in hamsters on a transcriptome level, supporting the  
642 morphologic observations from our experiment. Moreover, the data shows that i) the  
643 number of AT1 cells increased from 5 to 14 dpi, indicative of progressive alveolar  
644 regeneration, ii) cells with an ADI gene signature can be distinguished within AT1 and  
645 AT2 populations and they become more distinct and numerous at 14 dpi, iii) ADI cells  
646 partly express genes belonging to the *p53* and *DNA repair pathway* as well as *TGF*  
647 *beta -*, *notch-* and *wnt beta catenin* signaling, *EMT* and *angiogenesis pathways* iv)  
648 club cell genes are partly expressed in AT2 and ADI cells at 14 dpi in SARS-CoV-2  
649 infected hamsters.



650

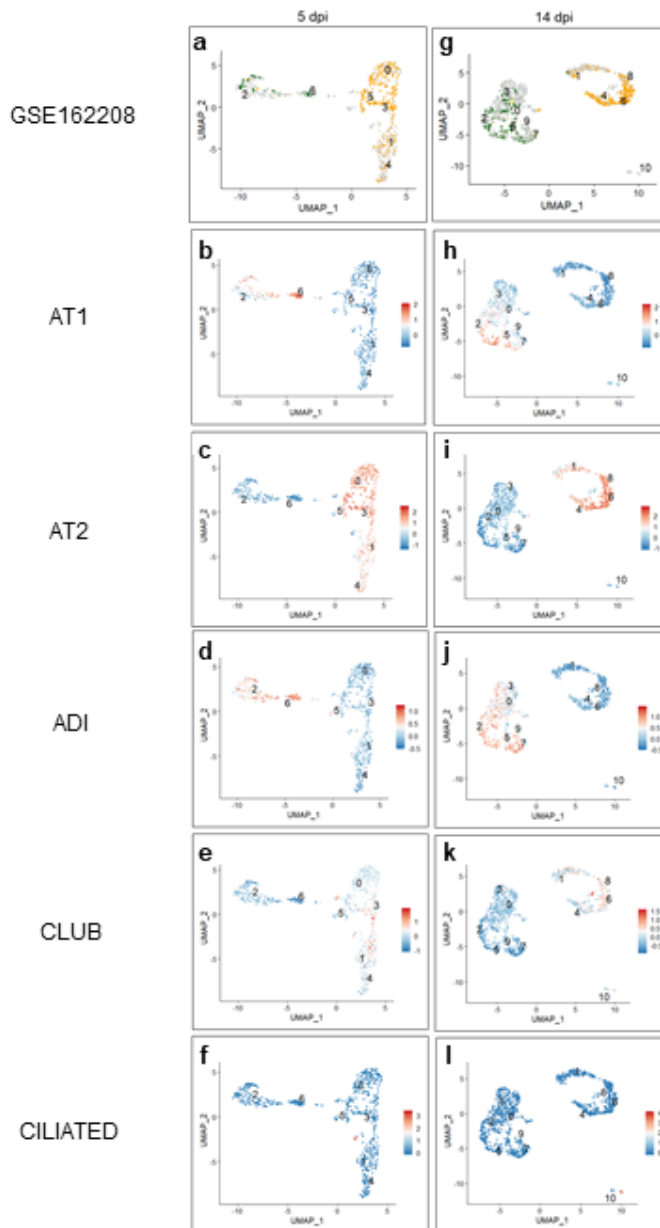

651

652 **Figure 6: Single cell analysis of alveolar cells in SARS-CoV-2 infected**  
653 **hamsters.** Single cell RNA-Seq data set (GSE162208) from lungs of SARS-CoV-2  
654 infected hamsters killed at 5 (A-F) or 14 (G-L) days post infection (dpi). **A, G**  
655 Expression of AT1 (green *Rtkn2*) and AT2 (orange *Lamp3*) marker genes. **B-F** and  
656 **H-L** Results from module score analysis for cell marker genes. For cell marker gene  
657 list, see supplementary table 1.

658

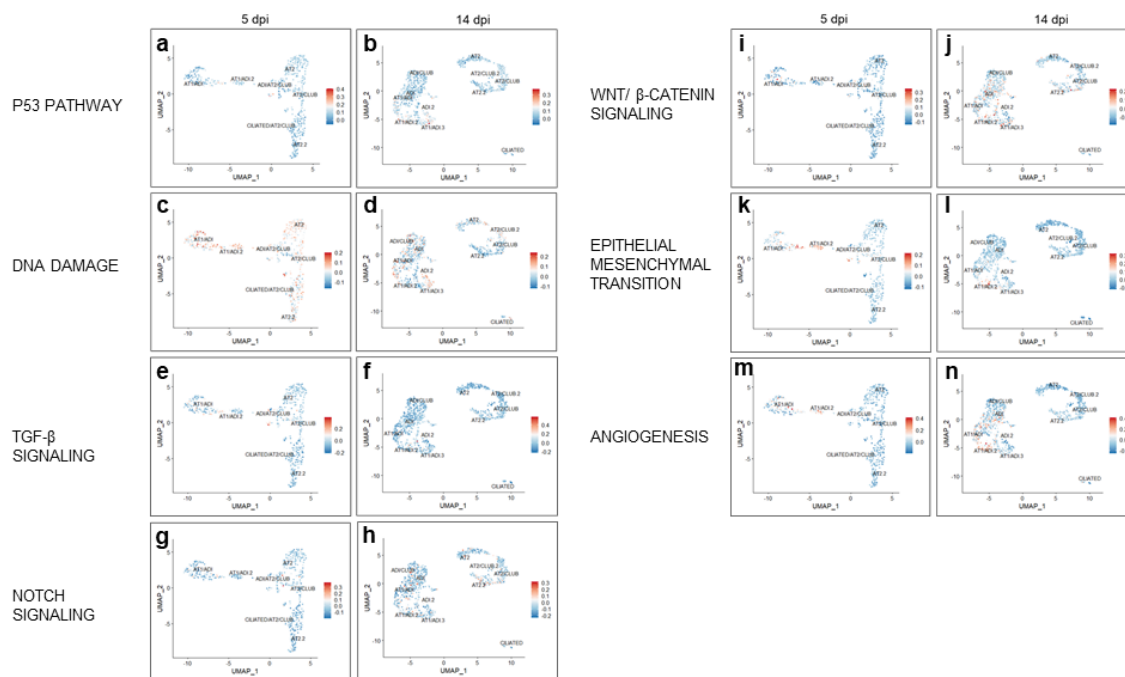

659

660 **Figure 7: Module scores for GSEA hallmark genes within alveolar cells in**  
661 **SARS-CoV-2 infected hamsters. A-N** Results from module score analysis for GSEA  
662 hallmark genes. The cluster names are indicated.

663

664

665

666

667

668

669

670

671

672

673

674

675

## 676 Discussion

677 The COVID-19 pandemic has claimed many lives and challenged the global  
678 healthcare system in an unprecedented way. Survivors of acute disease may be  
679 faced with a wide spectrum of long-lasting symptoms, with pulmonary,  
680 neuropsychiatric and cardiovascular sequelae at the forefront, which have a negative  
681 impact on the quality of life. Considering the staggering amount of patients reporting  
682 prolonged symptoms even as long as 15 months after the initial onset of COVID-19  
683 <sup>2,7,46,47</sup>, further research into potential pathomechanisms of this protracted recovery is  
684 urgently needed <sup>48</sup>. A possible explanation for the mechanisms underlying some  
685 PASC symptoms, such as dyspnea, shortness of breath and exercise intolerance,  
686 could be an impaired regeneration of alveolar tissue and lung fibrosis <sup>3,9</sup>. It has also  
687 been suggested that the persistence of CK8<sup>+</sup> ADI cells might be the cause of  
688 prolonged hypoxemia in COVID-19 patients <sup>8</sup>. Importantly, these conclusions are  
689 based on observations from tissues collected from acute, lethal COVID-19 cases. In  
690 contrast, we can only speculate about the presence of these cells in PASC, since  
691 samples from affected humans are scarce. Therefore, establishment and further  
692 characterization of appropriate animal models of PASC are urgently needed.

693 SARS-CoV-2 infected hamsters reliably phenocopy moderate to severe COVID-19 <sup>28</sup>.  
694 Recovering hamsters show a pronounced epithelial cell proliferation within airways  
695 and alveoli, which started at 3 dpi and was detectable until 14 dpi in the present  
696 study. This is in line with previous reports, which showed that proliferative foci can  
697 persist up to 31 dpi in hamsters<sup>33,49</sup>. Here, we characterized the proliferating epithelial  
698 cell types in more detail. First, we investigated the AT2-ADI-AT1 trajectory. In mouse  
699 models of lung injury, the transition from AT2 to the ADI state is characterized by  
700 progressive decrease of cell sphericity, expression of CK8 and loss of AT2 marker  
701 expression <sup>8,19-21</sup>. Double-labelling of SPC and CK8 demonstrated the transition of  
702 AT2 to ADI cells, associated with phenotypical changes as described above in  
703 SARS-CoV-2-infected hamsters. At 6 dpi, all stages of ADI cells were observed,  
704 including round, SPC<sup>+</sup>CK8<sup>+</sup> cells (early ADI stage) and polygonal, plump to  
705 elongated, SPC<sup>-</sup>CK8<sup>+</sup> cells (late ADI stage). Interestingly, at 14 dpi, we observed  
706 numerous round, SPC<sup>+</sup>CK8<sup>+</sup>, early ADI stages and fewer late ADI stages, which  
707 could indicate a new wave of ADI cell generation at this time-point. Lineage tracing  
708 studies in the mouse bleomycin lung injury model demonstrated that ADI cells could  
709 develop from AT2 as well as from MHCII<sup>+</sup> club cells migrating from the airways <sup>19</sup>. In

710 early stages after injury, peaking at 5 dpi, ADI cells are mainly derived from AT2  
711 cells, while club cell-derived ADI cells appear later, peaking at 10 dpi. Of note, a part  
712 of the MHCII<sup>+</sup> club cells differentiating towards ADI cells goes through an SPC<sup>+</sup> stage  
713 <sup>19</sup>. We speculate, that the round SPC<sup>+</sup>CK8<sup>+</sup> ADI cells observed at 14 dpi in SARS-  
714 CoV-2 infected hamsters could be derived from airway progenitors analogous to  
715 murine MHCII<sup>+</sup> club cells, which transiently assume an AT2 stage.

716 In addition to the demonstration of transitional cell stages on a morphological level,  
717 the presence of ADI cells in the hamster model of COVID-19 was confirmed using  
718 transcriptome data analysis. In addition, we created hamster-specific marker gene  
719 lists for different alveolar cell populations, including AT1, ADI and AT2 cells.  
720 Importantly, numerous cells with an ADI gene signature were detected at 14 dpi,  
721 which is indicative of an ongoing regenerative process at this time point and in line  
722 with the results obtained by the quantification of CK8 positive cells by  
723 immunolabeling. At 5 dpi, cells with ADI gene expression clustered with AT1 and AT2  
724 cells, suggestive of an AT2 origin. Interestingly, at 14 dpi, ADI gene expression was  
725 not found within the AT2 clusters. At this time point, a small number of ADI cells  
726 expressed a club cell signature. This observation reinforces the hypothesis, that two  
727 waves of ADI cells are generated in the course of SARS-CoV-2 infection of hamsters,  
728 which have their origin in AT2- and club cells, respectively.

729 CK8<sup>+</sup>ADI cells in SARS-CoV-2 infected hamsters frequently expressed nuclear TP53  
730 protein. Transcriptome data also showed that some cells with ADI gene signature  
731 displayed high scores for *p53 pathway* and for *DNA repair* hallmark genes at 5 and  
732 14 dpi. Nuclear TP53 regulates transcription of genes involved in cell cycle arrest and  
733 DNA repair and accumulation of TP53 is therefore detected in cells with high level of  
734 DNA damage <sup>50</sup>. ADI cells undergo mechanical stretch-induced DNA damage while  
735 migrating to cover the denuded septa and to differentiate into AT1 <sup>21,51</sup>. The nuclear  
736 expression of TP53 could reflect a particularly high level of injury, triggering DNA  
737 repair mechanisms. It is important to underline that in SARS-CoV-2 infected  
738 hamsters, nuclear TP53 expression was often found in hypertrophic CK8<sup>+</sup> cells with a  
739 bizarre morphology, binucleation or karyomegaly. We assume that these  
740 hypertrophic cells have accumulated a high level of DNA damage, are blocked in the  
741 ADI stage and are not likely to differentiate into slender AT1 cells. A permanent block  
742 in the ADI cell state has been described in idiopathic pulmonary fibrosis (IPF) and

743 mouse models of lung fibrosis<sup>8,20,52,53</sup>. Importantly, it has been demonstrated in a  
744 mouse model that induction of TP53-dependent AT2 senescence is sufficient to  
745 propagate progressive pulmonary fibrosis<sup>44,53</sup>. Besides TP53, other signaling  
746 pathways have been implicated in ADI cell senescence. For instance, *in vitro* studies  
747 in primary murine cells revealed that a chronic activation of WNT/ $\beta$ -catenin signaling  
748 can induce senescence and CK8 expression in ADI cells<sup>44,54</sup>. In addition, persistent  
749 Notch activation in AT2 cells induces retarded differentiation of AT2 into AT1 cells,  
750 resulting in ADI cell accumulation in a *Pseudomonas* lung injury model<sup>44,55</sup>.  
751 Moreover, persistent TGF- $\beta$  signaling has been shown to block ADI cells from  
752 differentiating into AT1 cells<sup>20</sup>. We showed that, from 5 to 14 dpi, an increasing  
753 number of cells with ADI gene signature had high scores for *Wnt/  $\beta$ -catenin* and  
754 *notch signaling* hallmark genes. In contrast, genes belonging to the TGF- $\beta$  signaling  
755 pathway showed no high scores at 14 dpi and were only detected in a small fraction  
756 of ADI cells at 5 dpi. Therefore, we speculate that prolonged *Wnt/  $\beta$ -catenin* and/or  
757 notch signaling, rather than excessive TGF- $\beta$ , could be responsible for the prolonged  
758 presence of ADI cells in SARS-CoV-2 infected hamsters. However, the available data  
759 do not allow us to assess the duration of the activation of the respective pathways in  
760 ADI cells and further studies with a more detailed analysis and additional time points  
761 are warranted to confirm this hypothesis. Besides dysregulation of the discussed  
762 pathways, a direct contribution of viral infection to the induction of senescence must  
763 be considered. It has been demonstrated that SARS-CoV-2 and other viruses can  
764 induce cellular senescence in infected AT2 cells<sup>56</sup>.

765 The clinical relevance of the observed ADI cell accumulation in hamsters deserves  
766 further investigation. In COVID-19 patients with a severe disease course and lethal  
767 outcome, high numbers of ADI cells were detected by others and in the present  
768 study, which indicates that dysregulated alveolar regeneration could play a role in the  
769 pathogenesis of severe disease<sup>8,9</sup>. In line with this, we found that TP53 is expressed  
770 by CK8<sup>+</sup> ADI cells in lethal COVID-19 samples, but not in CK8<sup>+</sup> ADI cells in a non-  
771 COVID pneumonia case.

772 In addition to the presence of ADI cells, the majority of SARS-CoV-2 infected animals  
773 showed foci of sub-pleural fibrosis at 14 dpi, indicative of irreversible  
774 damage/remodeling. This is in line with previous reports in hamsters<sup>57,58</sup>. The pattern  
775 of fibrosis is similar to what has been described in IPF patients and a RhoGTPase  
776 Cdc42 deletion mouse model of progressive pulmonary fibrosis<sup>23,59</sup>. In these

777 conditions, a progression of fibrotic lesions from periphery to center is typically  
778 encountered<sup>19,23</sup>. Subpleural alveoli are subject to increased mechanical tension  
779 during respiration, which has been shown to activate TGF- $\beta$ -mediated pro-fibrotic  
780 processes<sup>23,59</sup>. In addition to fibrotic foci, our study also revealed a prominent  
781 presence of CD204<sup>+</sup> M2 macrophages starting at 3 dpi and persisting until 14 dpi.  
782 M2-macrophages are known to promote fibrosis by a variety of factors, including  
783 TGF- $\beta$  secretion<sup>60</sup>. Thus, the fibrosis could be promoted by the prolonged presence  
784 of an unfavorably polarized inflammatory response. In addition to macrophages, AT2  
785 cells can promote a pro-fibrotic microenvironment by activating local fibroblasts to  
786 become myofibroblasts via paracrine signaling, as demonstrated *in vitro*<sup>45,61,62</sup>. This  
787 process was initiated by an induction of an EMT process in the AT2 cells<sup>53,62</sup>. Of  
788 note, it has been reported that EMT is activated in ADI cells<sup>19</sup> and the results from  
789 our transcriptome analysis showed that cells with ADI gene signature score high for  
790 EMT pathway gene expression at 5 and 14 dpi in SARS-CoV-2 infected hamsters.  
791 Therefore, besides M2-macrophages, ADI cells potentially contribute to a pro-fibrotic  
792 microenvironment. In addition, it has been reported that lung fibrotic lesions in  
793 COVID-19 patients are preceded by a prolonged blood vessel neo-formation<sup>63</sup>.  
794 Interestingly, transcriptome data revealed that numerous cells within AT1/ADI and  
795 ADI cell clusters showed high positive scores for *angiogenesis* hallmark genes at 14  
796 dpi, suggesting that ADI cells in hamsters might contribute also to a pro-angiogenic  
797 microenvironment, promoting vascular changes during lung fibrosis similar to COVID-  
798 19 patients. A recent study in a mouse model of COVID-19 demonstrated that aged  
799 mice infected with a mouse adapted strain of SARS-CoV-2 show fibrotic lesions  
800 starting from 15 dpi and persisting up to 120 dpi<sup>52</sup>. Similar to what we observed in  
801 the hamster model, the lesions were characterized by a subpleural deposition of  
802 collagen and presence of  $\alpha$ -SMA-positive myofibroblasts. The authors also described  
803 elevated numbers of M2-type macrophages, which persisted in chronic lesions.  
804 Moreover, this study also analyzed the dynamics of AT2-derived ADI cells and  
805 demonstrated that persistence of ADI cells is a feature of chronic lesions, in line with  
806 our findings in the hamster model. However, the study did not investigate airway  
807 progenitor cell contribution to alveolar regeneration. In contrast to this, we found a  
808 prominent airway progenitor mobilization into damaged alveoli in our hamster model,  
809 indicating that hamsters model this aspect of lung regeneration observed in humans  
810 more closely than mice.

811 Although pre-existing AT2 cells are described to be the predominant source of AT1s  
812 after alveolar damage, it is known that other cell types partake in regenerative  
813 processes, especially after severe injury<sup>15,40</sup>. In case of severe damage that involve  
814 broad epithelial denudation, basal cells can migrate into alveoli, become distal basal-  
815 like cells and subsequently promote alveolar regeneration giving rise to AT2<sup>15,38,44</sup>. A  
816 contribution of airway progenitors to alveolar repair has been reported in COVID-19  
817 patients<sup>24,64</sup>. In COVID-19 patients, the most prominent airway progenitors  
818 supporting alveolar regeneration were reported to be CK5<sup>+</sup> basal cells, which form  
819 the so-called "keratin 5 pods". Basal cell expansion, also termed "pod" is gradually  
820 recognized as common feature of epithelial remodeling<sup>17,44</sup>. To a lesser extent, more  
821 immature CK5<sup>+</sup>p63<sup>+</sup> basal cells were also reported to support alveolar regeneration in  
822 COVID-19 patients<sup>38</sup>. Conversely, in SARS-CoV-2 infected hamsters, we found  
823 predominantly CK14<sup>+</sup> cells within alveolar proliferation foci, resembling the human  
824 CK5<sup>+</sup> pods. Basal airways cells originate from the same CK5<sup>+</sup>CK14<sup>+</sup>p63<sup>+</sup> pool that  
825 gives rise to different combinations of CK5<sup>+/-</sup>, CK14<sup>+/-</sup>, p63<sup>+/-</sup> progenitor cells that will  
826 populate the airways<sup>41</sup>. Some of these cells also have the potential to give rise to  
827 AT2 cells<sup>40,41</sup>. It appears that the subpopulation might differ among various species.  
828 Human lung multipotent cells can differ from murine ones, and in its turn, we might  
829 expect the same for other rodents like hamsters. The CK14<sup>+</sup> basal cells detected in  
830 our study were having similar features like the ones described for human CK5<sup>+</sup> cells,  
831 namely pods formation and differentiation towards AT2 cells, and therefore can be  
832 considered the hamster equivalent of human basal cells contributing to alveolar  
833 repair.

834 The authors recognize that the study has some limitations. First, this work provides a  
835 whole slide digital quantification of the main cell types involved in alveolar  
836 regeneration upon SARS-CoV-2 infection, including CK8<sup>+</sup> ADI cells. However, since  
837 that several tested antibodies (anti-AGER, -AQP5, -PDPN) failed to specifically  
838 recognize AT1 cells in hamsters, a quantification of these cells and demonstration of  
839 ADI-AT1 transition by double-labeling was not possible. Therefore, the ADI-AT1  
840 transition was demonstrated with ultrastructural analysis, in line with previous  
841 COVID-19 reports. Second, we can only speculate on the clinical relevance ADI  
842 persistence and fibrotic lesions in the animals. However, once that this work  
843 confirmed hamsters to be a reliable model for these features, further investigations  
844 including longer time points and the assessment of lung function and gas-exchange

845 capacity are warranted. Third, the conclusions regarding cell origins in this work are  
846 based on double-labelling and co-expression of genes interpreted in the context of  
847 published literature. Additional studies involving lineage-tracing are required to  
848 irrefutably prove cell trajectories.

849 In conclusion, our study provides a detailed characterization of cell populations  
850 composing the pulmonary epithelial regenerative response in the hamster and thus  
851 provides preliminary and highly needed information about this important translational  
852 COVID-19 model. We show that ADI cells and airway-derived progenitors participate in  
853 alveolar regeneration in the species, and provide evidence of ongoing regeneration post  
854 virus-clearance. Thus, hamsters are a suitable model to investigate the relevance of  
855 these changes and their actual contribution to PASC symptoms. However, further  
856 studies including a longer investigation period and more detailed clinical analyses are  
857 required. Since post-COVID-19 pathological lesions show overlap with other diseases  
858 featuring DAD and IPF, the model can be used for broader implications.

859

## 860 **Material and methods**

861 **Hamster study.** The animal experiment was in accordance with the EU directive  
862 2010/63/EU and approved by the relevant local authorities (protocol code N032/2020  
863 22 April 2020). During the experiment the animals were under veterinary observation  
864 and all efforts were made to minimize distress. Eight to ten weeks old male and  
865 female Syrian golden hamsters (*Mesocricetus auratus*) purchased from Janvier Labs  
866 were housed under BSL-3 conditions for 2 weeks prior the experiment for  
867 acclimatization. A total of 80 hamsters divided into groups of 5 male and 5 female  
868 (n=10) animals per time point per infection group were housed in isolated ventilated  
869 cages under standardized conditions ( $21 \pm 2$  °C, 40 – 50 % relative humidity, 12:12  
870 light-dark cycle, food and water ad libitum) at the Heinrich Pette Institute, Leibniz  
871 Institute for Experimental Virology in Hamburg, Germany. Animals were infected with  
872 an intranasal inoculation of either a suspension containing  $10^5$  plaque-forming units  
873 (pfu) of SARS-CoV2 (SARS-CoV-2/Germany/Hamburg/01/2020; ENA study  
874 PRJEB41216 and sample ERS5312751) or phosphate-buffered saline (PBS, control)  
875 as previously described<sup>65</sup> under general anaesthesia. At 1, 3, 6 and 14 days post-  
876 infection (dpi), groups of five female and five male hamsters (n=10) per each  
877 treatment (either SARS-CoV-2 infected or mock infected) were euthanized by



878 intraperitoneal administration of a pentobarbital-overdose and blood withdrawal by  
879 cardiac puncture. Immediately after death, right lung lobes (*lobus cranialis*, *lobus*  
880 *medius*, *lobus caudalis*, *lobus accessorius*) were collected and fixed in 10 % neutral-  
881 buffered formalin (Chemie Vetrieb GmbH & Co) or 5 % glutaraldehyde (Merck KGaA)  
882 for microscopic and ultrastructural evaluation respectively.

883

884 **Virus.** SARS-CoV-2/Germany/Hamburg/01/2020 (ENA study PRJEB41216 and  
885 sample ERS5312751) was isolated from a nasopharyngeal swab of a confirmed  
886 COVID-19 patient. Stock virus was produced after three serial passages in Vero E6  
887 cells using Dulbecco's Modified Eagle's Medium (DMEM; Sigma) supplemented with  
888 2 % fetal bovine serum, 1 % penicillin-streptomycin and 1 % L-glutamine at 37 °C.  
889 The infection experiment was carried out under biosafety level 3 (BSL-3) conditions  
890 at the Heinrich Pette Institute, Leibniz Institute for Experimental Virology in Hamburg,  
891 Germany.

892

893 **Human samples.** Lung samples were obtained from three patients who died of  
894 respiratory failure caused by severe COVID-19. The patients were two men, aged 76  
895 and 74 years, and one woman, aged 74 years. The patients were hospitalized for 21,  
896 7 and 5 days, respectively, and all received mechanical ventilation. SARS-CoV-2  
897 infection was confirmed by PCR. The lung samples were obtained during autopsy. In  
898 addition, one non-COVID-19 lung sample was obtained from a 66-year-old man who  
899 underwent a lobectomy due to a pulmonary neoplasm. All patients or their relatives  
900 provided written informed consent for the use of their data and samples obtained  
901 during autopsy for scientific purposes. Ethical approval was given by the local  
902 institutional review board at Hannover Medical School (no. 9621\_BO\_K\_2021).

903

904 **Histopathology.** For histopathological evaluation, lung samples were formalin-fixed  
905 and embedded in paraffin. Serial sections of 2µm were cut and stained with  
906 hematoxylin and eosin (HE) and Azan trichrome. Qualitative evaluations with special  
907 emphasis on inflammatory and epithelial regenerative processes (HE) as well as on  
908 fibrosis (Azan) were performed in a blinded fashion by veterinary pathologists (FA,  
909 LH) and subsequently reviewed by board certified veterinary pathologist (MCI,WB).

910

911 **Immunohistochemistry.** Immunohistochemistry was performed to detect SARS-  
912 CoV-2 antigen (SARS-CoV-2 nucleo protein), macrophages and dendritic cells  
913 (ionized calcium-binding adapter molecule 1, IBA-1), alveolar pneumocytes type 2  
914 (pro surfactant protein C), alveolar differentiation intermediate cells (cytokeratin 8),  
915 airway basal cells (cytokeratin 14), club cells (secretoglobin 1A1), and M2  
916 macrophages (CD 204). Immunolabelings were visualized either using the Dako  
917 EnVision+ polymer system (Dako Agilent Pathology Solutions) and 3,3'-  
918 Diaminobenzidine tetrahydrochloride (DAB, Carl Roth) as previously described <sup>34</sup> or  
919 using avidin–biotin complex (ABC) peroxidase kit (Vector Labs) and DAB (Carl Roth)  
920 as previously described <sup>66</sup>. Nuclei were counterstained with hematoxylin. Further  
921 details about primary and secondary antibodies, visualization methods and dilutions  
922 used can be found in supplementary table 2. For negative controls, the primary  
923 antibodies were replaced with rabbit serum or BALB/cJ mouse ascitic fluid,  
924 respectively, with the dilution chosen according to protein concentration of the  
925 exchanged primary antibody. Antibodies were tested on murine and human lung  
926 tissue to confirm specificity for the cells of interest. Subsequently, murine and human  
927 tissues were used as positive controls.

928

929 **Immunofluorescence.** Double labelling immunofluorescence was performed to  
930 investigate different states of alveolar pneumocytes type 2 and alveolar differentiation  
931 intermediate cells, as well as to prove that airways progenitor cells can differentiate  
932 into alveolar cell types. Reaction was carried out as previously described with minor  
933 modifications <sup>67</sup>. Briefly, after deparaffinization, HIER and serum blocking, washing  
934 with PBS in between each step, a dilution containing two primary antibodies was  
935 added and incubated overnight at 4 °C. Afterwards, a dilution containing two  
936 secondary antibodies were incubated for 60 minutes at room temperature in the dark.  
937 After washing with PBS and distilled water, sections were counterstained and  
938 mounted using anti-fade mounting medium containing DAPI  
939 (Vectashield®HardSet™, Biozol). Further details about primary and secondary  
940 antibodies, visualization methods and dilutions used can be found in in  
941 supplementary table 3. For negative controls, the primary antibodies were replaced

942 with rabbit serum or BALB/cJ mouse ascitic fluid respectively with the dilution chosen  
943 according to protein concentration of the exchanged primary antibody.

944

945 **Transmission Electron Microscopy (TEM).** In order to detect AT1 cells with  
946 features of AT2 proving the final trajectory ADI-AT1 in hamsters, transmission  
947 electron microscopy was performed. Reactions were carried out as previously  
948 described<sup>65,68</sup>. Briefly, glutaraldehyde-fixed lung tissue was rinsed overnight in  
949 cacodylate buffer (Serva Electrophoresis GmbH), followed by post-fixation treatment  
950 in 1 % osmium tetroxide (Roth C. GmbH & Co. KG). After dehydration using a  
951 graded alcohol series, samples were embedded in epoxy resin. Representative areas  
952 of affected alveoli were then cut into ultrathin sections, contrasted with uranyl acetate  
953 and lead acetate and subsequently morphologically evaluated using a transmission  
954 electron microscope (EM 10C, Carl Zeiss Microscopy GmbH).

955

956 **Digital image analysis.** To quantify immunolabeled cells in pulmonary tissue, areas  
957 of alveolar epithelial proliferation as well as areas of subpleural fibrosis, slides were  
958 digitized using an Olympus VS200 Digital slide scanner (Olympus Deutschland  
959 GmbH). Image analysis was performed using QuPath (version 0.3.1), an open-  
960 source software package for digital pathology image analysis<sup>69</sup>. For all animals,  
961 whole slide images of the entire right lung were evaluated. or the pro surfactant  
962 protein C (proSPC), cytokeratin 8 (CK8), cytokeratin 14 (CK14), secretoglobin 1A1  
963 (SCGB1A1) immunolabelings, total lung tissue was first detected automatically using  
964 digital thresholding. Afterwards, regions of interest (ROI) were defined. The ROIs  
965 “airways” (bronchi, bronchioli, terminal bronchioli), “blood vessels”, “affected alveoli”  
966 (alveoli that were involved either in an inflammatory process or in a epithelial  
967 regenerative process or both) and “artifacts” were manually outlined. The area  
968 denoted as “total alveoli” was defined by subtraction of the “blood vessels”, “airways”  
969 and “artifacts” ROIs from the total lung tissue using an automated script. The area  
970 denoted as “unaffected alveoli” (alveoli that were morphologically free from any  
971 inflammatory or regenerative process) was defined by subtracting the ROI “affected  
972 alveoli” from the ROI “total alveoli” using an automated script. Using tissue- and  
973 marker-specific thresholding parameters, quantification of immunolabeled cells was  
974 achieved by automated positive cell detection in all ROI. To analyze SARS-CoV-2

975 NP, IBA-1 and CD204 immunolabeling, total lung tissue was automatically detected  
976 using digital thresholding. Afterwards, only blood vessels and artifacts were indicated  
977 as ROIs and subtracted from the total lung tissue. Based on tissue and marker  
978 specific thresholding parameters, quantification of immunolabeled cells was then  
979 achieved by automated positive cell detection. For quantification of alveolar epithelial  
980 proliferation or subpleural fibrosis, total lung tissue area was automatically detected  
981 using digital thresholding. Subsequently, either alveolar epithelial proliferation or  
982 subpleural fibrosis were marked as ROIs and the total area was calculated. Finally,  
983 the percentage of total lung area affected by either epithelial proliferation or  
984 subpleural fibrosis was obtained. All procedures (tissue detection, indication of ROIs,  
985 positive cell detection) were performed and subsequently reviewed by at least two  
986 veterinary pathologists (FA, GB, LH, MC). Statistical analysis and graphs design  
987 were performed using GraphPad Prism 9.3.1 (GraphPad Software, San Diego, CA,  
988 USA) for Windows™. Single comparison between SARS-CoV-2 infected hamsters  
989 and control group were tested with a two-tailed Mann–Whitney-U test. For multiple  
990 comparisons among different time-points data were tested for significant differences  
991 using Kruskal–Wallis tests and corrected for multiple group comparisons using the  
992 Benjamini–Hochberg correction. Statistical significance was accepted at exact p-  
993 values of  $\leq 0.05$ .

994

#### 995 **single-cell RNAseq.**

996 Single-cell RNASeq data from lungs of SARS-CoV-2 infected hamsters was obtained  
997 from a publicly available dataset <sup>43</sup>. Data were analyzed using the R software  
998 package (version 3.6.0) <sup>70</sup>. Expression data were downloaded from GEO  
999 (<https://www.ncbi.nlm.nih.gov/geo/>, GSE162208) and Seurat objects (version  
1000 Seurat\_3.2.0, <sup>71-74</sup> were generated from h5 files by combining replicate samples from  
1001 lung day5 and day14. Pre-processing of data was performed by applying several  
1002 Seurat functions: subset (subset = nFeature\_RNA > 200 & nFeature\_RNA < 2500 &  
1003 percent.mt < 5), NormalizeData (data), FindVariableFeatures (data, selection.method  
1004 = "vst", nfeatures = 2000), ScaleData(data, features = all.genes), and clusters  
1005 identified using functions RunPCA(data, features = VariableFeatures (object = data)),  
1006 FindNeighbors (data, dims = 1:10), FindClusters (data, resolution = 0.5). AT1 and  
1007 AT2 cell cluster were then identified by using the marker genes *Rtnk2* (AT1) and

1008 *Lamp3* (AT2), respectively, from the original publication<sup>43</sup>. These clusters were  
1009 selected, then pre-processed and re-clustered as described above. We then  
1010 collected more candidate marker genes for AT1, AT2 and additional cell populations  
1011 in these clusters by applying functions FindAllMarkers (pbmc, only.pos = TRUE,  
1012 min.pct = 0.25, logfc.threshold = 0.25) and selecting the top 10 markers genes per  
1013 cluster. We further identified additional candidate markers from<sup>9,19,43</sup>. We evaluated  
1014 the specificity of these candidate markers by visualizing them with the functions  
1015 FeaturePlot, DoHeatmap and AddModuleScore. The list of final maintained marker  
1016 genes is presented in supplementary table 1. The function AddModuleScore was  
1017 then used to visualize the various cell populations and hallmark genes from the  
1018 GSEA database (<sup>75</sup> <http://www.gsea-msigdb.org/gsea/msigdb>).

1019

#### 1020 **Data Availability:**

1021 Source data will be provided with this paper.

1022

#### 1023 **Acknowledgements**

1024 The authors are grateful to Julia Baskas, Petra Grünig, Jana-Svea Harre, Kerstin  
1025 Rohn, Caroline Schütz, and Kerstin Schöne for excellent technical assistance. This  
1026 project was in part supported by the COVID-19 Research Network of the State of  
1027 Lower Saxony (COFONI) with funding from the Ministry of Science and Culture of  
1028 Lower Saxony, Germany (14-76403-184, project number 5FF22, Federico Armando,  
1029 Wolfgang Baumgärtner, Malgorzata Ciurkiewicz). This research was in part  
1030 supported by the Deutsche Forschungsgemeinschaft (DFG; German Research  
1031 Foundation) -398066876/GRK 2485/1, Wolfgang Baumgärtner, Georg Beythien,  
1032 Laura Heydemann). This study was also supported in part by intra-mural grants from  
1033 the Helmholtz-Association (Program Infection and Immunity), and NIAID Research  
1034 Grants 2-U19-AI100625-06 REVISED and 5U19A|100625-07 awarded to Klaus  
1035 Schughart.

1036

#### 1037 **Author Contributions Statement**

1038 The study was designed by FA, WB and MC. The animal experiments were  
1039 performed by SS-B, BS, NM-K, SB, MZ and GG. Histology, immunolabelling and

1040 electron microscopy evaluation of hamster tissues was conducted and analyzed by  
1041 FA, LH, MC, GB, KB, AB and WB. Pathological analysis of human samples was  
1042 performed by MK. scRNA-seq analysis was performed by KS. Data analysis and  
1043 interpretation were performed by FA, LH, MC and GB. Figures were prepared by MC,  
1044 KS and FA. The original draft was written by LH, MC, FA and KS. The manuscript  
1045 was reviewed, edited, and approved by all authors. Funding was acquired by MC, KS  
1046 and WB. The project was supervised by WB and FA

1047

#### 1048 **Competing Interests Statement**

1049 The authors declare no competing interests.

1050

#### 1051 **REFERENCES**

- 1052 1 WHO. *A clinical case definition of post COVID-19 condition by a Delphi consensus, 6 October*  
1053 *2021*, <[https://www.who.int/publications/i/item/WHO-2019-nCoV-Post\\_COVID-](https://www.who.int/publications/i/item/WHO-2019-nCoV-Post_COVID-19_condition-Clinical_case_definition-2021.1)  
1054 [19\\_condition-Clinical\\_case\\_definition-2021.1](https://www.who.int/publications/i/item/WHO-2019-nCoV-Post_COVID-19_condition-Clinical_case_definition-2021.1)> (2021).
- 1055 2 Nalbandian, A. *et al.* Post-acute COVID-19 syndrome. *Nat. Med.* **27**, 601-615,  
1056 doi:10.1038/s41591-021-01283-z (2021).
- 1057 3 Castanares-Zapatero, D. *et al.* Pathophysiology and mechanism of long COVID: a  
1058 comprehensive review. *Ann Med* **54**, 1473-1487, doi:10.1080/07853890.2022.2076901  
1059 (2022).
- 1060 4 Sudre, C. H. *et al.* Attributes and predictors of long COVID. *Nat Med* **27**, 626-631,  
1061 doi:10.1038/s41591-021-01292-y (2021).
- 1062 5 Ayoubkhani, D. P. & Gaughan, C. *Technical article: Updated estimates of the prevalence of*  
1063 *post-acute symptoms among people with coronavirus (COVID-19) in the UK: 26 April 2020 to*  
1064 *1 August 2021.*,  
1065 <[https://www.ons.gov.uk/peoplepopulationandcommunity/healthandsocialcare/conditionsa](https://www.ons.gov.uk/peoplepopulationandcommunity/healthandsocialcare/conditionsanddiseases/articles/technicalarticleupdatedestimatesoftheprevalenceofpostacutesymptomsamongpeoplewithcoronaviruscovid19inthek/26april2020to1august2021)  
1066 [nddiseases/articles/technicalarticleupdatedestimatesoftheprevalenceofpostacutesymptoms](https://www.ons.gov.uk/peoplepopulationandcommunity/healthandsocialcare/conditionsanddiseases/articles/technicalarticleupdatedestimatesoftheprevalenceofpostacutesymptomsamongpeoplewithcoronaviruscovid19inthek/26april2020to1august2021)  
1067 [amongpeoplewithcoronaviruscovid19inthek/26april2020to1august2021](https://www.ons.gov.uk/peoplepopulationandcommunity/healthandsocialcare/conditionsanddiseases/articles/technicalarticleupdatedestimatesoftheprevalenceofpostacutesymptomsamongpeoplewithcoronaviruscovid19inthek/26april2020to1august2021)> (2021).
- 1068 6 Staudt, A. *et al.* Associations of Post-Acute COVID syndrome with physiological and clinical  
1069 measures 10 months after hospitalization in patients of the first wave. *Eur J Intern Med* **95**,  
1070 50-60, doi:10.1016/j.ejim.2021.10.031 (2022).
- 1071 7 Fernandez-de-Las-Penas, C., Martin-Guerrero, J. D., Cancela-Cilleruelo, I., Moro-Lopez-  
1072 Menchero, P. & Pellicer-Valero, O. J. Exploring the recovery curve for long-term post-COVID  
1073 dyspnea and fatigue. *Eur J Intern Med* **101**, 120-123, doi:10.1016/j.ejim.2022.03.036 (2022).
- 1074 8 Ting, C. *et al.* Fatal COVID-19 and Non-COVID-19 Acute Respiratory Distress Syndrome Is  
1075 Associated with Incomplete Alveolar Type 1 Epithelial Cell Differentiation from the  
1076 Transitional State without Fibrosis. *Am J Pathol* **192**, 454-467,  
1077 doi:10.1016/j.ajpath.2021.11.014 (2022).
- 1078 9 Melms, J. C. *et al.* A molecular single-cell lung atlas of lethal COVID-19. *Nature* **595**, 114-119,  
1079 doi:10.1038/s41586-021-03569-1 (2021).
- 1080 10 Parimon, T. *et al.* Potential Mechanisms for Lung Fibrosis Associated with COVID-19 Infection.  
1081 *QJM*, doi:10.1093/qjmed/hcac206 (2022).

- 1082 11 Carsana, L. *et al.* Pulmonary post-mortem findings in a series of COVID-19 cases from  
1083 northern Italy: a two-centre descriptive study. *The Lancet Infectious Diseases* **20**, 1135-1140,  
1084 doi:10.1016/s1473-3099(20)30434-5 (2020).
- 1085 12 Polak, S. B., Van Gool, I. C., Cohen, D., von der Thusen, J. H. & van Paassen, J. A systematic  
1086 review of pathological findings in COVID-19: a pathophysiological timeline and possible  
1087 mechanisms of disease progression. *Mod. Pathol.* **33**, 2128-2138, doi:10.1038/s41379-020-  
1088 0603-3 (2020).
- 1089 13 Liu, Q. *et al.* Lung regeneration by multipotent stem cells residing at the bronchioalveolar-  
1090 duct junction. *Nat Genet* **51**, 728-738, doi:10.1038/s41588-019-0346-6 (2019).
- 1091 14 Liu, K. *et al.* Bi-directional differentiation of single bronchioalveolar stem cells during lung  
1092 repair. *Cell Discov* **6**, 1, doi:10.1038/s41421-019-0132-8 (2020).
- 1093 15 Kathiriya, J. J., Brumwell, A. N., Jackson, J. R., Tang, X. & Chapman, H. A. Distinct Airway  
1094 Epithelial Stem Cells Hide among Club Cells but Mobilize to Promote Alveolar Regeneration.  
1095 *Cell Stem Cell* **26**, 346-358 e344, doi:10.1016/j.stem.2019.12.014 (2020).
- 1096 16 Barkauskas, C. E. A Specialized Few Among Many: Identification of a Novel Lung Epithelial  
1097 Stem Cell Population. *Cell Stem Cell* **26**, 295-296, doi:10.1016/j.stem.2020.02.010 (2020).
- 1098 17 Vaughan, A. E. *et al.* Lineage-negative progenitors mobilize to regenerate lung epithelium  
1099 after major injury. *Nature* **517**, 621-625, doi:10.1038/nature14112 (2015).
- 1100 18 Jiang, P. *et al.* Ineffectual Type 2-to-Type 1 Alveolar Epithelial Cell Differentiation in  
1101 Idiopathic Pulmonary Fibrosis: Persistence of the KRT8(hi) Transitional State. *Am J Respir Crit*  
1102 *Care Med* **201**, 1443-1447, doi:10.1164/rccm.201909-1726LE (2020).
- 1103 19 Strunz, M. *et al.* Alveolar regeneration through a Krt8+ transitional stem cell state that  
1104 persists in human lung fibrosis. *Nat Commun* **11**, 3559, doi:10.1038/s41467-020-17358-3  
1105 (2020).
- 1106 20 Riemondy, K. A. *et al.* Single cell RNA sequencing identifies TGF $\beta$  as a key regenerative cue  
1107 following LPS-induced lung injury. *JCI Insight* **5**, doi:10.1172/jci.insight.123637 (2019).
- 1108 21 Kobayashi, Y. *et al.* Persistence of a regeneration-associated, transitional alveolar epithelial  
1109 cell state in pulmonary fibrosis. *Nat. Cell Biol.* **22**, 934-946, doi:10.1038/s41556-020-0542-8  
1110 (2020).
- 1111 22 Jansing, N. L. *et al.* Unbiased Quantitation of Alveolar Type II to Alveolar Type I Cell  
1112 Transdifferentiation during Repair after Lung Injury in Mice. *Am J Respir Cell Mol Biol* **57**, 519-  
1113 526, doi:10.1165/rcmb.2017-0037MA (2017).
- 1114 23 Wu, H. *et al.* Progressive Pulmonary Fibrosis Is Caused by Elevated Mechanical Tension on  
1115 Alveolar Stem Cells. *Cell* **180**, 107-121.e117, doi:10.1016/j.cell.2019.11.027 (2020).
- 1116 24 Delorey, T. M. *et al.* COVID-19 tissue atlases reveal SARS-CoV-2 pathology and cellular  
1117 targets. *Nature*, doi:10.1038/s41586-021-03570-8 (2021).
- 1118 25 Bharat, A. *et al.* Lung transplantation for patients with severe COVID-19. *Sci Transl Med* **12**,  
1119 doi:10.1126/scitranslmed.abe4282 (2020).
- 1120 26 Chan, J. F. *et al.* Simulation of the Clinical and Pathological Manifestations of Coronavirus  
1121 Disease 2019 (COVID-19) in a Golden Syrian Hamster Model: Implications for Disease  
1122 Pathogenesis and Transmissibility. *Clin. Infect. Dis.* **71**, 2428-2446, doi:10.1093/cid/ciaa325  
1123 (2020).
- 1124 27 Sia, S. F. *et al.* Pathogenesis and transmission of SARS-CoV-2 in golden hamsters. *Nature* **583**,  
1125 834-838, doi:10.1038/s41586-020-2342-5 (2020).
- 1126 28 Muñoz-Fontela, C. *et al.* Animal models for COVID-19. *Nature* **586**, 509-515,  
1127 doi:10.1038/s41586-020-2787-6 (2020).
- 1128 29 Ciurkiewicz, M. *et al.* Ferrets are valuable models for SARS-CoV-2 research. *Vet Pathol* **59**,  
1129 661-672, doi:10.1177/03009858211071012 (2022).
- 1130 30 Winkler, E. S. *et al.* SARS-CoV-2 infection of human ACE2-transgenic mice causes severe lung  
1131 inflammation and impaired function. *Nat Immunol* **21**, 1327-1335, doi:10.1038/s41590-020-  
1132 0778-2 (2020).

- 1133 31 Becker, K. *et al.* Vasculitis and Neutrophil Extracellular Traps in Lungs of Golden Syrian  
1134 Hamsters With SARS-CoV-2. *Front. Immunol.* **12**, 640842, doi:10.3389/fimmu.2021.640842  
1135 (2021).
- 1136 32 Allnoch, L. *et al.* Vascular Inflammation Is Associated with Loss of Aquaporin 1 Expression on  
1137 Endothelial Cells and Increased Fluid Leakage in SARS-CoV-2 Infected Golden Syrian  
1138 Hamsters. *Viruses* **13**, doi:10.3390/v13040639 (2021).
- 1139 33 Mulka, K. R. *et al.* Progression and Resolution of Severe Acute Respiratory Syndrome  
1140 Coronavirus 2 (SARS-CoV-2) Infection in Golden Syrian Hamsters. *Am J Pathol* **192**, 195-207,  
1141 doi:10.1016/j.ajpath.2021.10.009 (2022).
- 1142 34 Armando, F. *et al.* SARS-CoV-2 Omicron variant causes mild pathology in the upper and lower  
1143 respiratory tract of hamsters. *Nat Commun* **13**, 3519, doi:10.1038/s41467-022-31200-y  
1144 (2022).
- 1145 35 Lantz, R. C., Birch, K., Hinton, D. E. & Burrell, R. Morphometric changes of the lung induced by  
1146 inhaled bacterial endotoxin. *Exp Mol Pathol* **43**, 305-320, doi:10.1016/0014-4800(85)90068-1  
1147 (1985).
- 1148 36 Ochs, M. *et al.* Using electron microscopes to look into the lung. *Histochem Cell Biol* **146**, 695-  
1149 707, doi:10.1007/s00418-016-1502-z (2016).
- 1150 37 Chen, J., Wu, H., Yu, Y. & Tang, N. Pulmonary alveolar regeneration in adult COVID-19  
1151 patients. *Cell Res.* **30**, 708-710, doi:10.1038/s41422-020-0369-7 (2020).
- 1152 38 Zuo, W. *et al.* p63(+)Krt5(+) distal airway stem cells are essential for lung regeneration.  
1153 *Nature* **517**, 616-620, doi:10.1038/nature13903 (2015).
- 1154 39 Zacharias, W. J. *et al.* Regeneration of the lung alveolus by an evolutionarily conserved  
1155 epithelial progenitor. *Nature* **555**, 251-255, doi:10.1038/nature25786 (2018).
- 1156 40 Parekh, K. R. *et al.* Stem cells and lung regeneration. *Am. J. Physiol. Cell Physiol.* **319**, C675-  
1157 C693, doi:10.1152/ajpcell.00036.2020 (2020).
- 1158 41 Smirnova, N. F. *et al.* Detection and quantification of epithelial progenitor cell populations in  
1159 human healthy and IPF lungs. *Respir. Res.* **17**, 83, doi:10.1186/s12931-016-0404-x (2016).
- 1160 42 Musah, S., Chen, J. & Hoyle, G. W. Repair of tracheal epithelium by basal cells after chlorine-  
1161 induced injury. *Respir. Res.* **13**, 107, doi:10.1186/1465-9921-13-107 (2012).
- 1162 43 Nouailles, G. *et al.* Temporal omics analysis in Syrian hamsters unravel cellular effector  
1163 responses to moderate COVID-19. *Nat Commun* **12**, 4869, doi:10.1038/s41467-021-25030-7  
1164 (2021).
- 1165 44 Xie, T. *et al.* Abnormal respiratory progenitors in fibrotic lung injury. *Stem Cell. Res. Ther.* **13**,  
1166 64, doi:10.1186/s13287-022-02737-y (2022).
- 1167 45 Carvallo, F. R. & Stevenson, V. B. Interstitial pneumonia and diffuse alveolar damage in  
1168 domestic animals. *Vet. Pathol.* **59**, 586-601, doi:10.1177/03009858221082228 (2022).
- 1169 46 Guler, S. A. *et al.* Pulmonary function and radiological features 4 months after COVID-19: first  
1170 results from the national prospective observational Swiss COVID-19 lung study. *Eur. Respir. J.*  
1171 **57**, doi:10.1183/13993003.03690-2020 (2021).
- 1172 47 Desai, A. D., Lavelle, M., Boursiquot, B. C. & Wan, E. Y. Long-term complications of COVID-19.  
1173 *Am. J. Physiol. Cell Physiol.* **322**, C1-c11, doi:10.1152/ajpcell.00375.2021 (2022).
- 1174 48 Singh, I. & Joseph, P. Short and Long Term Non-Invasive Cardiopulmonary Exercise  
1175 Assessment in previously Hospitalized COVID-19 Patients. *Eur. Respir. J.*,  
1176 doi:10.1183/13993003.01739-2022 (2022).
- 1177 49 Frere, J. J. *et al.* SARS-CoV-2 infection in hamsters and humans results in lasting and unique  
1178 systemic perturbations post recovery. *Sci Transl Med*, eabq3059,  
1179 doi:10.1126/scitranslmed.abq3059 (2022).
- 1180 50 Baptiste, N. & Prives, C. p53 in the cytoplasm: a question of overkill? *Cell* **116**, 487-489,  
1181 doi:10.1016/s0092-8674(04)00164-3 (2004).
- 1182 51 McGregor, A. L., Hsia, C. R. & Lammerding, J. Squish and squeeze-the nucleus as a physical  
1183 barrier during migration in confined environments. *Curr. Opin. Cell Biol.* **40**, 32-40,  
1184 doi:10.1016/j.ceb.2016.01.011 (2016).



- 1185 52 Dinno, K. H., 3rd *et al.* SARS-CoV-2 infection produces chronic pulmonary epithelial and  
1186 immune cell dysfunction with fibrosis in mice. *Sci. Transl. Med.* **14**, eabo5070,  
1187 doi:10.1126/scitranslmed.abo5070 (2022).
- 1188 53 Yao, C. *et al.* Senescence of Alveolar Type 2 Cells Drives Progressive Pulmonary Fibrosis. *Am.*  
1189 *J. Respir. Crit. Care Med.* **203**, 707-717, doi:10.1164/rccm.202004-1274OC (2021).
- 1190 54 Lehmann, M. *et al.* Chronic WNT/ $\beta$ -catenin signaling induces cellular senescence in lung  
1191 epithelial cells. *Cell. Signal.* **70**, 109588, doi:10.1016/j.cellsig.2020.109588 (2020).
- 1192 55 Finn, J. *et al.* Dlk1-Mediated Temporal Regulation of Notch Signaling Is Required for  
1193 Differentiation of Alveolar Type II to Type I Cells during Repair. *Cell Rep.* **26**, 2942-  
1194 2954.e2945, doi:10.1016/j.celrep.2019.02.046 (2019).
- 1195 56 Lee, S. *et al.* Virus-induced senescence is a driver and therapeutic target in COVID-19. *Nature*  
1196 **599**, 283-289, doi:10.1038/s41586-021-03995-1 (2021).
- 1197 57 Rosenke, K. *et al.* Defining the Syrian hamster as a highly susceptible preclinical model for  
1198 SARS-CoV-2 infection. *Emerg Microbes Infect* **9**, 2673-2684,  
1199 doi:10.1080/22221751.2020.1858177 (2020).
- 1200 58 Song, Z. *et al.* SARS-CoV-2 Causes a Systemically Multiple Organs Damages and Dissemination  
1201 in Hamsters. *Front. Microbiol.* **11**, 618891, doi:10.3389/fmicb.2020.618891 (2020).
- 1202 59 Hinz, B. Mechanical aspects of lung fibrosis: a spotlight on the myofibroblast. *Proc. Am.*  
1203 *Thorac. Soc.* **9**, 137-147, doi:10.1513/pats.201202-017AW (2012).
- 1204 60 Braga, T. T., Agudelo, J. S. & Camara, N. O. Macrophages During the Fibrotic Process: M2 as  
1205 Friend and Foe. *Front. Immunol.* **6**, 602, doi:10.3389/fimmu.2015.00602 (2015).
- 1206 61 Hill, C., Jones, M. G., Davies, D. E. & Wang, Y. Epithelial-mesenchymal transition contributes  
1207 to pulmonary fibrosis via aberrant epithelial/fibroblastic cross-talk. *J Lung Health Dis* **3**, 31-35  
1208 (2019).
- 1209 62 Yao, L. *et al.* Paracrine signalling during ZEB1-mediated epithelial-mesenchymal transition  
1210 augments local myofibroblast differentiation in lung fibrosis. *Cell Death Differ.* **26**, 943-957,  
1211 doi:10.1038/s41418-018-0175-7 (2019).
- 1212 63 Ackermann, M. *et al.* The fatal trajectory of pulmonary COVID-19 is driven by lobular  
1213 ischemia and fibrotic remodelling. *EBioMedicine* **85**, 104296,  
1214 doi:10.1016/j.ebiom.2022.104296 (2022).
- 1215 64 Zhao, Z. *et al.* Single-cell analysis identified lung progenitor cells in COVID-19 patients. *Cell*  
1216 *Prolif* **53**, e12931, doi:10.1111/cpr.12931 (2020).
- 1217 65 Schreiner, T. *et al.* SARS-CoV-2 Infection Dysregulates Cilia and Basal Cell Homeostasis in the  
1218 Respiratory Epithelium of Hamsters. *Int. J. Mol. Sci.* **23**, doi:10.3390/ijms23095124 (2022).
- 1219 66 Armando, F. *et al.* Intratumoral Canine Distemper Virus Infection Inhibits Tumor Growth by  
1220 Modulation of the Tumor Microenvironment in a Murine Xenograft Model of Canine  
1221 Histiocytic Sarcoma. *Int. J. Mol. Sci.* **22**, doi:10.3390/ijms22073578 (2021).
- 1222 67 Armando, F. *et al.* Mesenchymal to epithelial transition driven by canine distemper virus  
1223 infection of canine histiocytic sarcoma cells contributes to a reduced cell motility in vitro. *J.*  
1224 *Cell. Mol. Med.* **24**, 9332-9348, doi:10.1111/jcmm.15585 (2020).
- 1225 68 Armando, F. *et al.* Endocanicular transendothelial crossing (ETC): A novel intravasation  
1226 mode used by HEK-EBNA293-VEGF-D cells during the metastatic process in a xenograft  
1227 model. *PLoS One* **15**, e0239932, doi:10.1371/journal.pone.0239932 (2020).
- 1228 69 Bankhead, P. *et al.* QuPath: Open source software for digital pathology image analysis. *Sci.*  
1229 *Rep.* **7**, 16878, doi:10.1038/s41598-017-17204-5 (2017).
- 1230 70 R\_Core\_Team. R: A language and environment for statistical computing. *R Foundation for*  
1231 *Statistical Computing, Vienna, Austria* URL <http://www.R-project.org/> (2014).
- 1232 71 Satija, R., Farrell, J. A., Gennert, D., Schier, A. F. & Regev, A. Spatial reconstruction of single-  
1233 cell gene expression data. *Nat. Biotechnol.* **33**, 495-502, doi:10.1038/nbt.3192 (2015).
- 1234 72 Butler, A., Hoffman, P., Smibert, P., Papalexi, E. & Satija, R. Integrating single-cell  
1235 transcriptomic data across different conditions, technologies, and species. *Nat. Biotechnol.*  
1236 **36**, 411-420, doi:10.1038/nbt.4096 (2018).

- 1237 73 Stuart, T. *et al.* Comprehensive Integration of Single-Cell Data. *Cell* **177**, 1888-1902.e1821,  
1238 doi:10.1016/j.cell.2019.05.031 (2019).
- 1239 74 Hao, Y. *et al.* Integrated analysis of multimodal single-cell data. *Cell* **184**, 3573-3587.e3529,  
1240 doi:10.1016/j.cell.2021.04.048 (2021).
- 1241 75 Liberzon, A. *et al.* The Molecular Signatures Database (MSigDB) hallmark gene set collection.  
1242 *Cell Syst* **1**, 417-425, doi:10.1016/j.cels.2015.12.004 (2015).
- 1243
- 1244

1245 **Hamsters are a model for COVID-19 alveolar regeneration mechanisms: an**  
1246 **opportunity to understand post-acute sequelae of SARS-CoV-2**

1247

1248 Laura Heydemann<sup>1,§</sup>, Małgorzata Ciurkiewicz<sup>1,§</sup> Georg Beythien<sup>1</sup>, Kathrin Becker<sup>1</sup>,  
1249 Klaus Schughart<sup>2,3</sup>, Stephanie Stanelle-Bertram<sup>4</sup>, Berfin Schaumburg<sup>4</sup>, Nancy  
1250 Mounogou-Kouassi<sup>4</sup>, Sebastian Beck<sup>4</sup>, Martin Zickler<sup>4</sup>, Mark Kühnel<sup>5,6</sup>, Gülsah  
1251 Gabriel<sup>4</sup>, Andreas Beineke<sup>1</sup>, Wolfgang Baumgärtner<sup>1,#</sup> and Federico Armando<sup>1,#</sup>

1252

1253 <sup>1</sup> Department of Pathology, University of Veterinary Medicine, Foundation, Hannover,  
1254 Germany

1255 <sup>2</sup> Department of Microbiology, Immunology and Biochemistry, University of  
1256 Tennessee Health Science Center, Memphis, Tennessee, USA,

1257 <sup>3</sup> Institute of Virology Münster, University of Münster, Münster, Germany

1258 <sup>4</sup> Department for Viral Zoonoses-One Health, Leibniz Institute for Virology, Hamburg,  
1259 Germany;

1260 <sup>5</sup> Institute of Pathology, Hannover Medical School (MHH), Hannover, Germany

1261 <sup>6</sup> Member of the German Center for Lung Research (DZL), Biomedical Research in  
1262 Endstage and Obstructive Lung Disease Hannover (BREATH), Hannover Medical  
1263 School (MHH), Hannover, Germany

1264 <sup>§</sup> These authors contributed equally as co-first authors

1265 <sup>#</sup> These authors contributed equally as co-last authors

1266

1267 **Correspondence** and requests for materials should be addressed to Wolfgang

1268 Baumgärtner. [Wolfgang.baumgaertner@tiho-hannover.de](mailto:Wolfgang.baumgaertner@tiho-hannover.de)

1269

1270 **SUPPLEMENTARY DATA**

1271

1272 This file contains:

1273 **Supplementary tables: 3**

1274 **Supplementary figures: 7**

1275

1276

1277 **Supplementary table 1:** Marker gene list of main pulmonary cell populations in the hamster  
 1278 species.

| AT2             | AT1            | ADI            | CLUB           | CILIATED             |
|-----------------|----------------|----------------|----------------|----------------------|
| <i>Sftpc</i>    | <i>Col12a1</i> | <i>S100a10</i> | <i>Pigr</i>    | <i>Ccdc153</i>       |
| <i>Napsa</i>    | <i>Sema3a</i>  | <i>Anxa3</i>   | <i>Ifitm2</i>  | <i>Caps</i>          |
| <i>Fabp5</i>    | <i>Dag1</i>    | <i>S100a6</i>  | <i>Gss</i>     | <i>Dynlrb2</i>       |
| <i>Scd1</i>     | <i>Aqp5</i>    | <i>Krt7</i>    | <i>Scgb3a2</i> | <i>1700094D03Rik</i> |
| <i>Sftpa1</i>   | <i>Gprc5a</i>  | <i>Krt8</i>    | <i>Hp</i>      |                      |
| <i>Ctsc</i>     | <i>Cav1</i>    | <i>Dstn</i>    | <i>Fam216b</i> |                      |
| <i>Lamp3</i>    | <i>Vegfa</i>   | <i>Anxa1</i>   |                |                      |
| <i>Pgc</i>      | <i>Cav2</i>    | <i>Tuft1</i>   |                |                      |
| <i>Lgi3</i>     | <i>Itga3</i>   | <i>Tacstd2</i> |                |                      |
| <i>Sfta2</i>    | <i>Lama5</i>   | <i>Klf6</i>    |                |                      |
| <i>Gas6</i>     | <i>Nckap5</i>  | <i>Lmo7</i>    |                |                      |
| <i>Egfl6</i>    | <i>Abca5</i>   | <i>Cdkn1a</i>  |                |                      |
| <i>Lcn2</i>     | <i>Itm2a</i>   | <i>Tp53</i>    |                |                      |
| <i>Atp1a1</i>   | <i>Limd2</i>   | <i>Tnip3</i>   |                |                      |
| <i>Abca3</i>    | <i>Wsb1</i>    | <i>Hbegf</i>   |                |                      |
| <i>Sftpd</i>    | <i>Sec14l3</i> | <i>Ggh</i>     |                |                      |
| <i>Slc34a2</i>  | <i>Prdx6</i>   | <i>Steap4</i>  |                |                      |
| <i>Serpine2</i> | <i>Mfge8</i>   | <i>Zfp36</i>   |                |                      |
|                 | <i>Ccnd2</i>   | <i>Junb</i>    |                |                      |
|                 | <i>Timp3</i>   | <i>Jun</i>     |                |                      |
|                 |                | <i>Fos</i>     |                |                      |
|                 |                | <i>CRYAB</i>   |                |                      |
|                 |                | <i>Ndnf</i>    |                |                      |
|                 |                | <i>Timp2</i>   |                |                      |
|                 |                | <i>Emp2</i>    |                |                      |
|                 |                | <i>Sox4</i>    |                |                      |
|                 |                | <i>Wwtr1</i>   |                |                      |
|                 |                | <i>Sparc</i>   |                |                      |

1279 Abbreviations: alveolar pneumocytes type 2 (AT2), alveolar pneumocytes type 1 (AT1), alveolar  
 1280 differentiation intermediate cells (ADI), club cells (CLUB), ciliated cells (CILIATED)

1281

1282 **Supplementary table 2:** Primary antibodies, visualization method, dilution, clonality and host  
 1283 species, secondary antibody as well as positive controls used for immunohistochemical  
 1284 investigations.

| Primary antibody                                           | Visualization method | Dilution  | Clonality, host species         | Secondary antibody (1:200) | Positive control                                      |
|------------------------------------------------------------|----------------------|-----------|---------------------------------|----------------------------|-------------------------------------------------------|
| CK8 (Invitrogen, PA5-29607)                                | EnVision             | 1 : 250   | Polyclonal, rabbit              | /                          | Airways (Hu, Ms, Hm internal control)                 |
| CK14 (Invitrogen, PA5-16722)                               | ABC                  | 1 : 500   | Polyclonal, rabbit              | GAR-b                      | Airways (Hu, Ms, Hm internal control)                 |
| SCGB1A1 (Proteintec, 10490-1-AP)                           | ABC                  | 1 : 200   | Polyclonal, rabbit              | GAR-b                      | Airways (Hu, Ms, Hm internal control)                 |
| proSP-C (MEMD Millipore, AB3786 )                          | EnVision             | 1 : 1000  | Polyclonal, rabbit              | /                          | Alveolar AT2 (Hu, Ms, Hm internal control)            |
| IBA-1 (FUJIFILM Wako Pure Chemical Corporation, 019–19741) | ABC                  | 1 : 500   | Polyclonal, rabbit              | GAR-b                      | SARS-CoV-2 Infected lung, 6 dpi (Hm internal control) |
| SARS CoV-2-NP (Sinobiological, 40143-MM05)                 | EnVision             | 1 : 16000 | Monoclonal, mouse, clone 5      | GAM-b                      | SARS-CoV-2 Infected lung, 3 dpi (Hm internal control) |
| $\alpha$ -SMA (Dako, GA611)                                | ABC                  | 1: 500    | Monoclonal, mouse, Clone 1A4    | GAM-b                      | Airways and vessels (Hu, Ms, Hm internal control)     |
| CD-204 (Abnova Corporation, MAB1710)                       | ABC                  | 1:1000    | Monoclonal, mouse, clone SRA-E5 | GAM-b                      | SARS-CoV-2 Infected lung, 6 dpi (Hm internal control) |

1285

1286 Abbreviations:  $\alpha$ -SMA: alpha smooth muscle actin; ABC: Avidin-biotin-complex; CK8: cytokeratin 8;  
 1287 CK14: cytokeratin 14; GAR-b: goat anti rabbit-biotinylated; GAM-b: goat anti mouse-biotinylated; Hm:  
 1288 hamster; Hu: human; IBA-1: ionized calcium-binding adapter molecule 1; Ms: mouse; SARS-CoV-2  
 1289 NP: severe acute respiratory syndrome coronavirus-2 nucleo protein; SCGB1A1: secretoglobin 1A1;  
 1290 proSP-c: pro surfactant protein C;

1291

1292 **Supplementary table 3:** Primary antibodies, dilution, clonality and host species as well as

| Primary antibody                       | Dilution | Clonality, host species           | Secondary antibody<br>(1:200) |
|----------------------------------------|----------|-----------------------------------|-------------------------------|
| CK8 (Invitrogen, PA5-29607)            | 1 : 500  | Polyclonal, rabbit                | GAR Cy2/ GAR Cy3              |
| CK8-FITC conjugated (abcam, ab192467)  | 1 : 200  | Monoclonal, rabbit, clone EP1628Y | /                             |
| CK14 (Invitrogen, PA5-16722)           | 1 : 500  | Polyclonal, rabbit                | GAR Cy2                       |
| CK14 (Invitrogen, MA5-11599)           | 1 : 500  | Monoclonal, mouse, clone LL002    | GAM Cy2/ GAMCy3               |
| proSP-C (MEMD Millipore, AB3786 )      | 1 : 1000 | Polyclonal, rabbit                | GAR Cy3                       |
| SCGB1A1 (Proteintec, 10490-1-AP)       | 1 : 200  | Polyclonal, rabbit                | GAR Cy3                       |
| TP53 (Novusbio, NBP2-29453)            | 1 : 100  | Monoclonal, mouse, clone BP53-12  | GAM Cy3                       |
| ΔNp63 (Cell signalling, #67825S)       | 1 : 800  | Monoclonal, rabbit, clone E6Q30   | GAR Cy3                       |
| CK5-FITC conjugated (Abcam, ab-193894) | 1 : 200  | Monoclonal, rabbit, clone EP1601Y | /                             |

1293 secondary antibody used for immunofluorescence investigations.

1294 Abbreviations: Cy2: cyanin 2 conjugated; Cy3: cyanin 3 conjugated; CK8: cytokeratin 8; CK14:  
1295 cytokeratin 14; CK5: cytokeratin 5; GAR-b: goat anti rabbit-biotinylated; GAM-b: goat anti mouse-  
1296 biotinylated;

1297

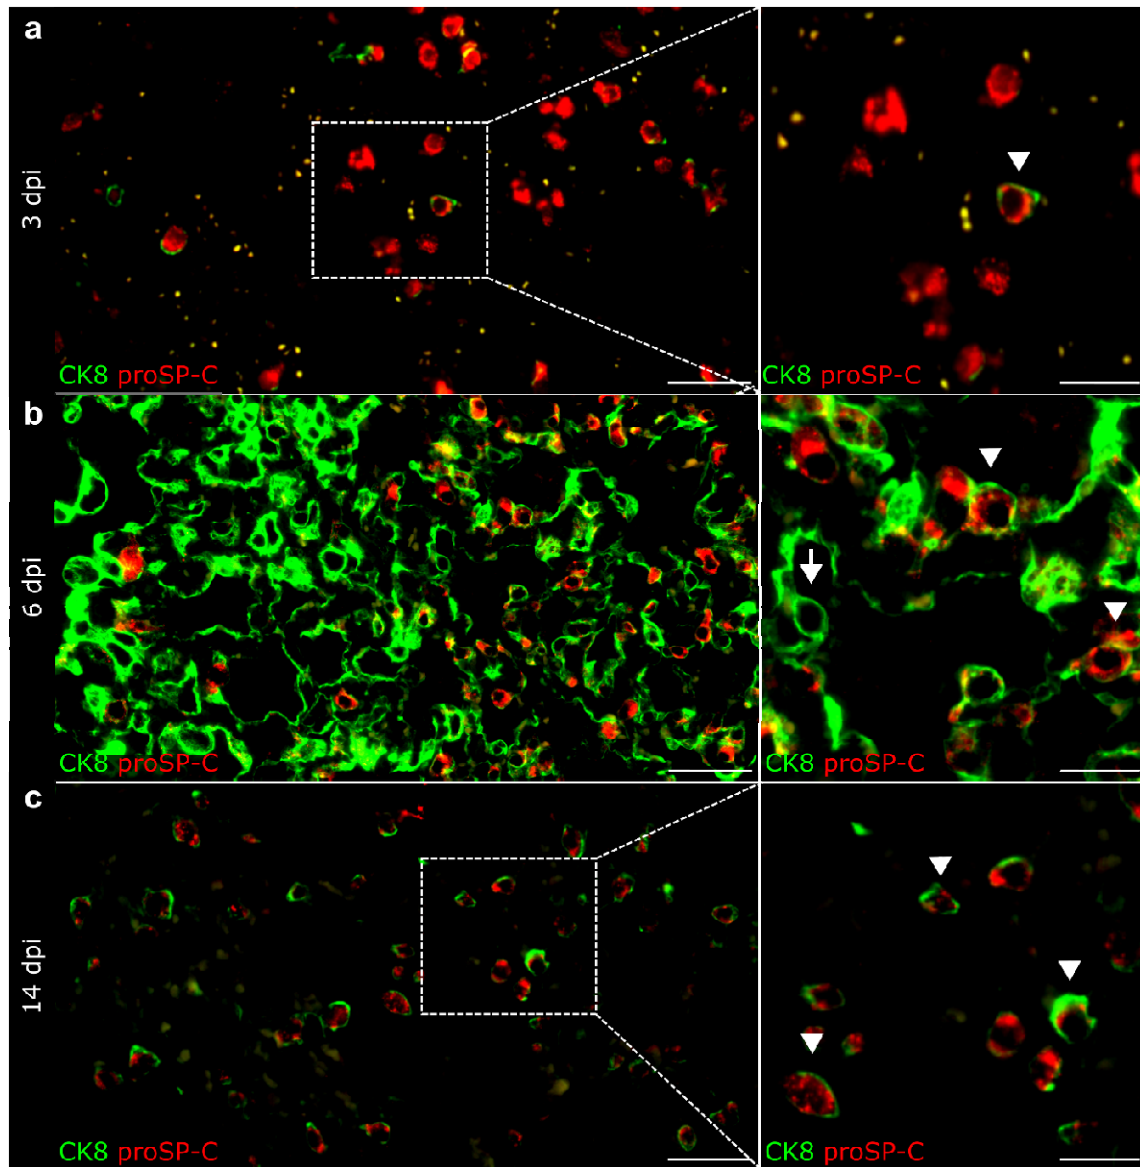

1298

1299 **Supplementary figure 1: Alveolar pneumocytes type 2 (AT2) - alveolar**  
1300 **differentiation intermediate (ADI) cell trajectory in SARS-CoV-2 infected**  
1301 **hamsters at different time points post infection.**

1302 Representative double immunofluorescence images of alveoli in a SARS-CoV-2  
1303 infected hamsters at 3 (A), 6 (B) and 14 (C) days post infection (dpi). Cells are  
1304 labelled with CK8 (green) and proSP-C (red). For each time point, an overview and  
1305 higher magnification of the area delineated by the rectangle are shown. **A** At 3 dpi,  
1306 there are numerous, round, proSP-C<sup>+</sup>CK8<sup>-</sup> AT2 cells and rare, round, proSP-C<sup>+</sup>CK8<sup>+</sup>  
1307 ADI cells (arrowhead). **B** Alveolar proliferation at 6 dpi contain numerous proSP-C<sup>-</sup>  
1308 CK8<sup>+</sup>ADI cells, some showing hypertrophy and elongated cytoplasmic processes  
1309 (arrow). There are single proSP-C<sup>+</sup>CK8<sup>+</sup> cells with a round morphology (arrowheads).  
1310 **C** At 14 dpi, there are numerous round, proSP-C<sup>+</sup>CK8<sup>+</sup> ADI cells (arrowheads) and  
1311 rare round proSP-C<sup>+</sup>CK8<sup>-</sup> AT2 cells. Scale bars: 50  $\mu$ m (left panel) and 20  $\mu$ m (right  
1312 panel).

1313



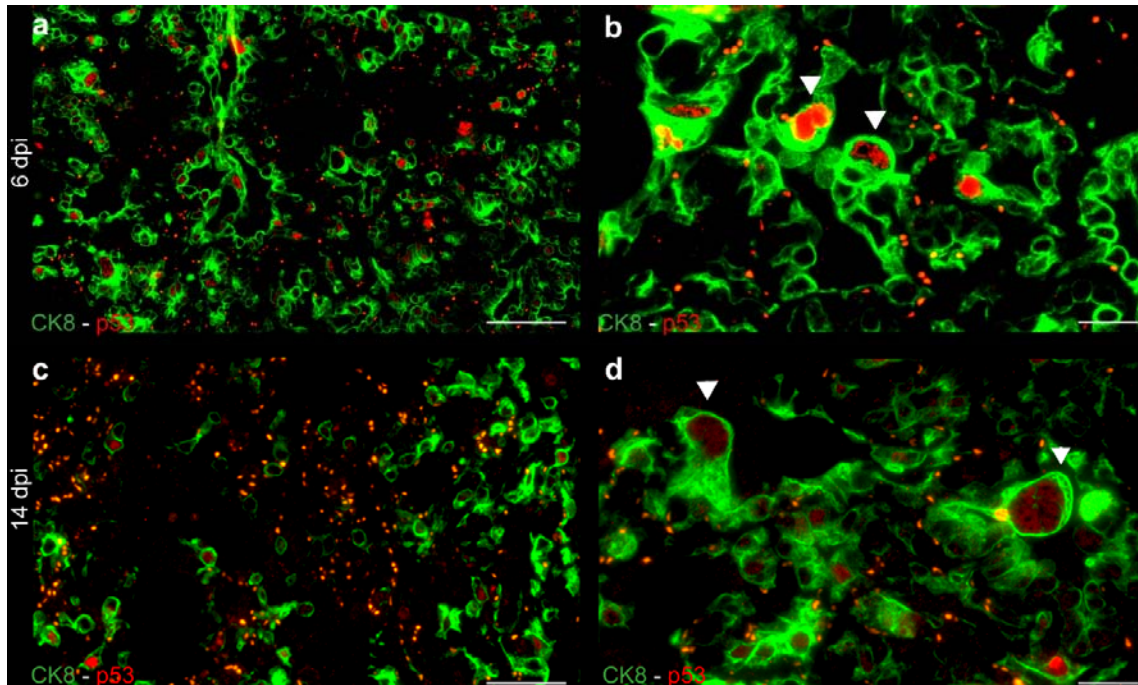

1314

1315 **Supplementary figure 2: Alveolar differentiation intermediate (ADI) cells exhibit**  
1316 **cell cycle arrest in SARS-CoV-2 infected hamsters at different time points post**  
1317 **infection.**

1318 Representative double immunofluorescence images of alveoli in SARS-CoV-2  
1319 infected hamsters at 6 (A, B) and 14 (C, D) days post infection (dpi). Cells are  
1320 labelled with CK8 (green) and TP53 (red). **A, B** Overview and high magnification of  
1321 proliferation focus at 6 dpi showing numerous CK8<sup>+</sup> ADI expressing nuclear TP53.  
1322 The high magnification shows polygonal, large, bizarre TP53<sup>+</sup> ADI cells  
1323 (arrowheads). **C** Overview of morphologically normal alveoli at 14 dpi showing  
1324 numerous TP53<sup>+</sup> ADI cells with a round morphology. **D** Large, bizarre TP53<sup>+</sup> ADI  
1325 cells (arrowheads) within residual alveolar lesions at 14 dpi. Scale bars: 50 μm and  
1326 20 μm (b,d).

1327

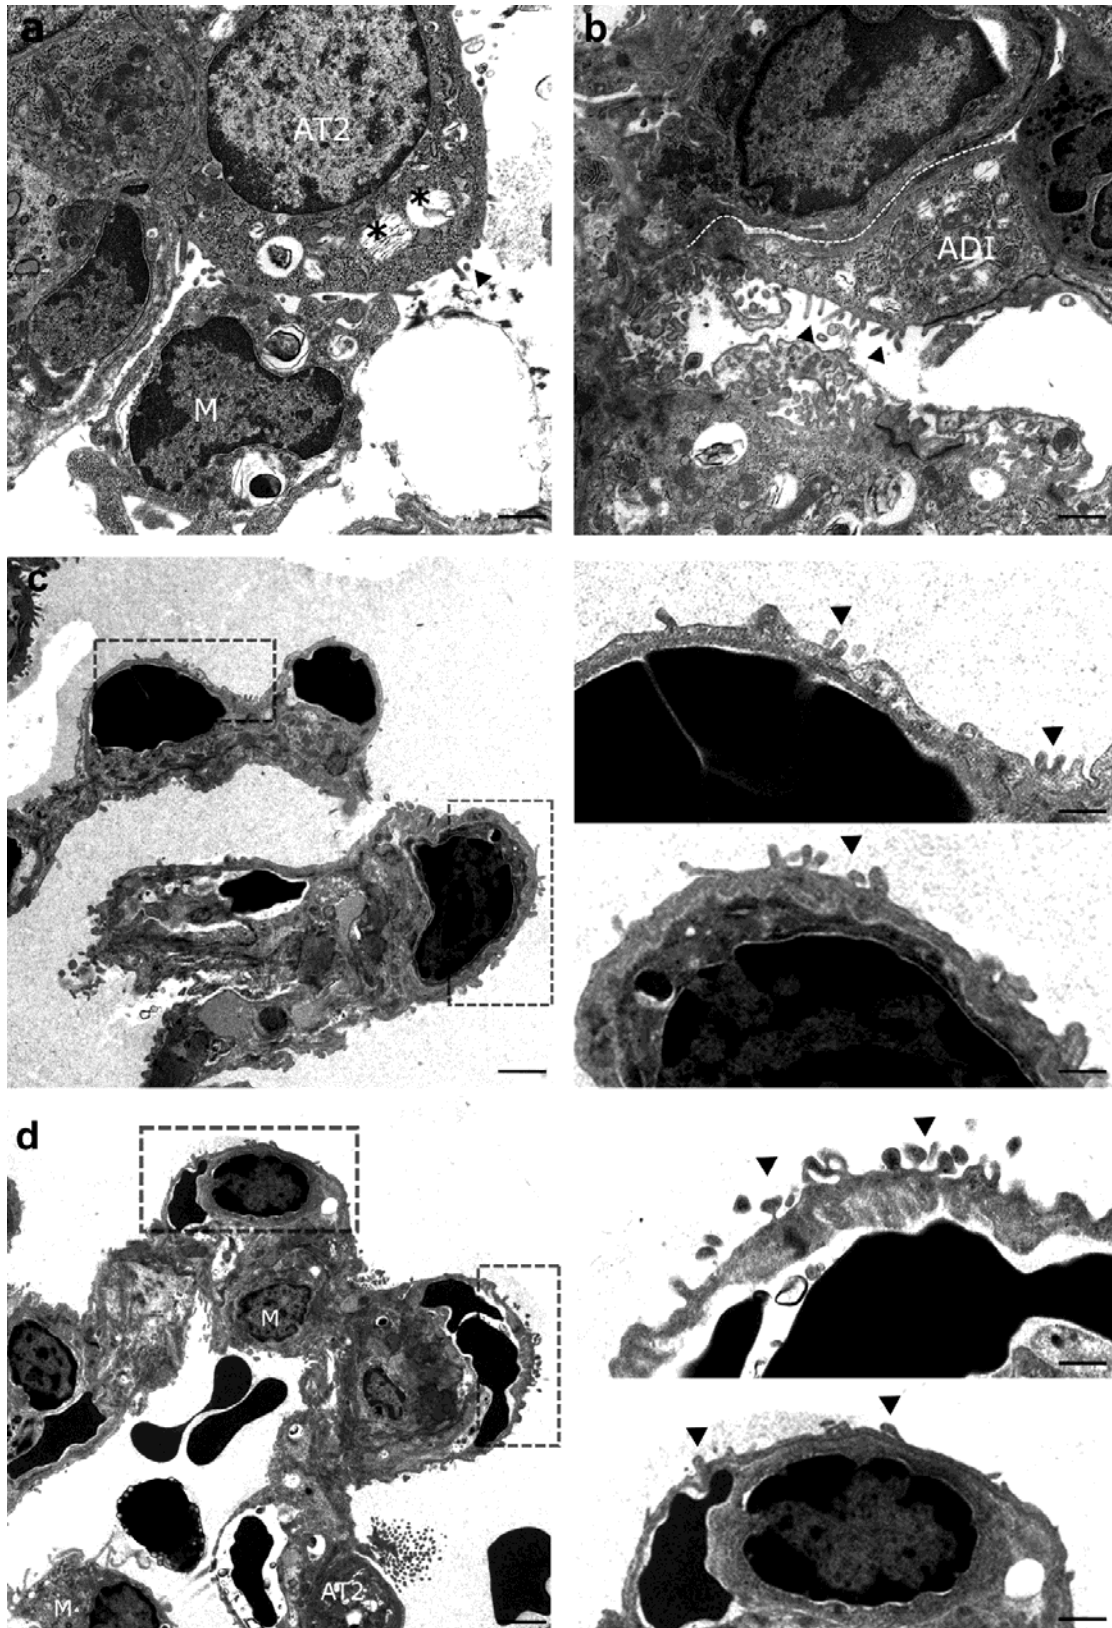

1328

1329

1330

1331

**Supplementary figure 3: Alveolar pneumocytes type 1 (AT1) - alveolar differentiation intermediate (ADI) cells trajectory in SARS-CoV-2 infected hamsters.**

1332 **A** Transmission electron microscopy (TEM) micrograph of normal alveolar cells  
1333 showing a round cell (AT2) with apico-basal polarity, apical microvilli (arrowhead),  
1334 moderately electron-dense cytoplasm, rich in rough endoplasmic reticulum and free  
1335 ribosomes as well as numerous membrane-bound vesicles containing multiple  
1336 concentric membrane layers (multi-lamellar bodies, asterisks). On the left, a  
1337 macrophage with intracytoplasmic multi-lamellar bodies is also seen (M). **B**  
1338 Representative micrograph showing alveoli of a SARS-CoV-2 infected hamster at 6  
1339 dpi. In the center, a stretching cell (ADI) showing AT2 features like ribosome-rich  
1340 cytoplasm and microvilli (arrowheads) on the cell surface is seen. The dotted line  
1341 indicates the basal contour of the cell, highlighting the elongated shape. **C, D**  
1342 Representative micrograph showing alveoli of SARS-CoV-2 infected hamsters at 6  
1343 dpi. Overviews and higher magnification of the areas delineated by rectangles are  
1344 shown. Alveolar septae are covered by delicate, elongated cells, separated by a thin  
1345 basement membrane from capillaries containing erythrocytes. Macrophages (M) as  
1346 well as an AT2 cell (AT2) are also seen. Rectangles and high magnification show  
1347 cells with flattened and elongated morphology of AT1 cells but also retained  
1348 characteristics of AT2 cells, such as apical microvilli (arrowheads), indicative of a  
1349 transitional state. Scale bars: 1000 nm (a), 500 nm, 2000 (overview in c, d), 500 nm  
1350 (high magnifications in c, d).

1351

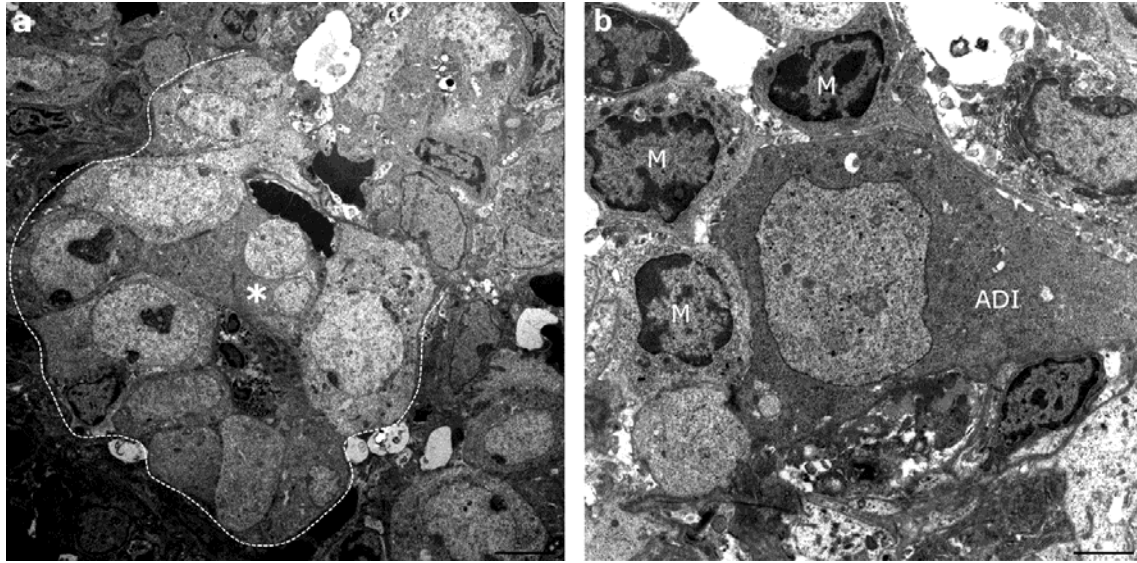

1352

1353 **Supplementary figure 4: Epithelial proliferates and in SARS-CoV-2 infected**  
1354 **hamsters.**

1355 **A** Transmission electron microscopy (TEM) micrograph of an epithelial proliferation  
1356 focus from a SARS-CoV-2 infected hamster at 6 days post infection (dpi). A string of  
1357 proliferating, polygonal to columnar epithelial cells forming a tubule-like structure  
1358 (dotted line) is shown. The cells show hypertrophy, numerous prominent  
1359 mitochondria and irregularly clumped chromatin. A bizarre cell with two unevenly  
1360 large nuclei is also present (asterisk). **B** Micrograph of an ADI cell within a  
1361 proliferation focus from a SARS-CoV-2 infected hamster at 6 dpi. A triangular,  
1362 hypertrophic ADI cell surrounded by multiple macrophages (M) is shown. Scale bars:  
1363 500 nm.

1364

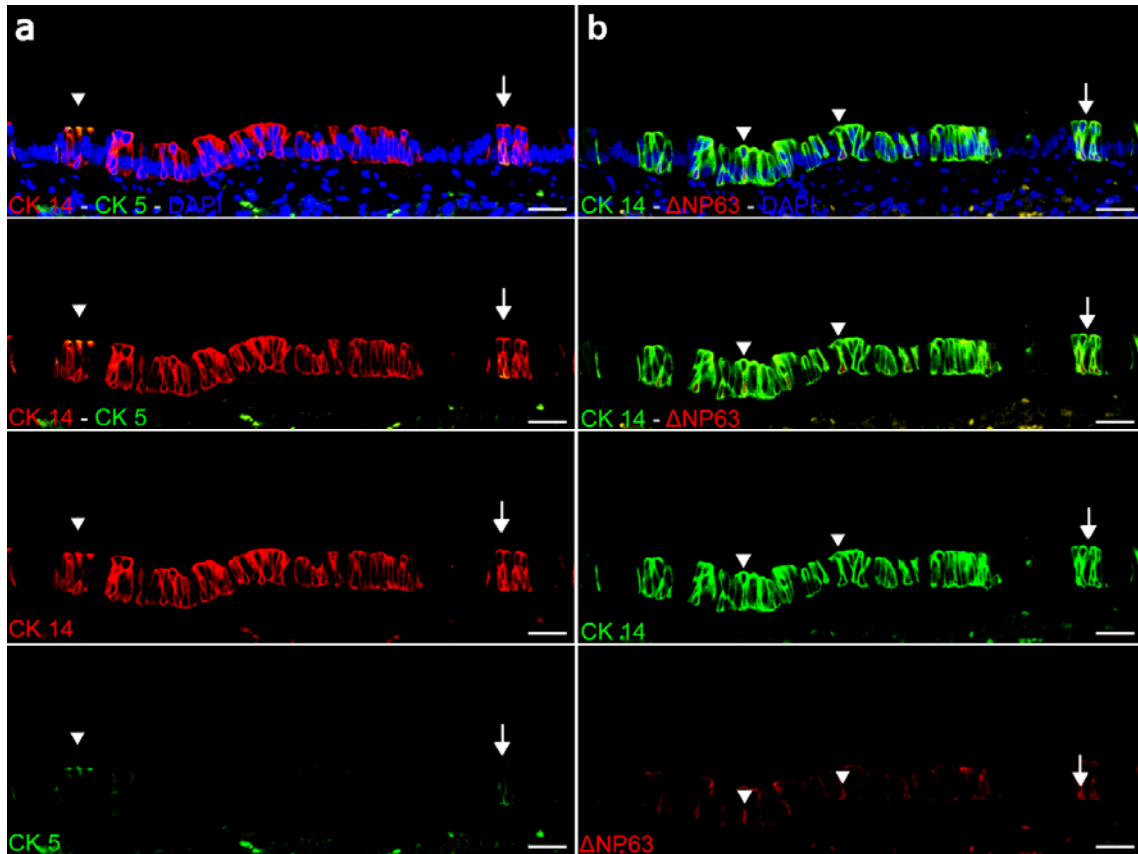

1365

1366

**Supplementary figure 5: basal cells in the airways of hamsters.**

1367

1368

1369

1370

1371

1372

1373

1374

**A** Representative images of double immunofluorescence for CK5 (green) and CK14 (red) in a hamster airway, showing numerous CK14<sup>+</sup>CK5<sup>-</sup> cells and occasional double labelled CK14<sup>+</sup>CK5<sup>+</sup> cells (arrowheads). **B** Representative image of double immunofluorescence for CK14 (green) and ΔNP63 (red) in a hamster airway, taken at the same location as the images in a. There are numerous CK14<sup>+</sup>ΔNP63<sup>-</sup> cells and fewer CK14<sup>+</sup>ΔNP63<sup>+</sup> cells (arrowheads). Cells indicated by an arrow in A and B are considered CK5<sup>+</sup>CK14<sup>+</sup>ΔNP63<sup>+</sup>. Scale bars: 25 μm.

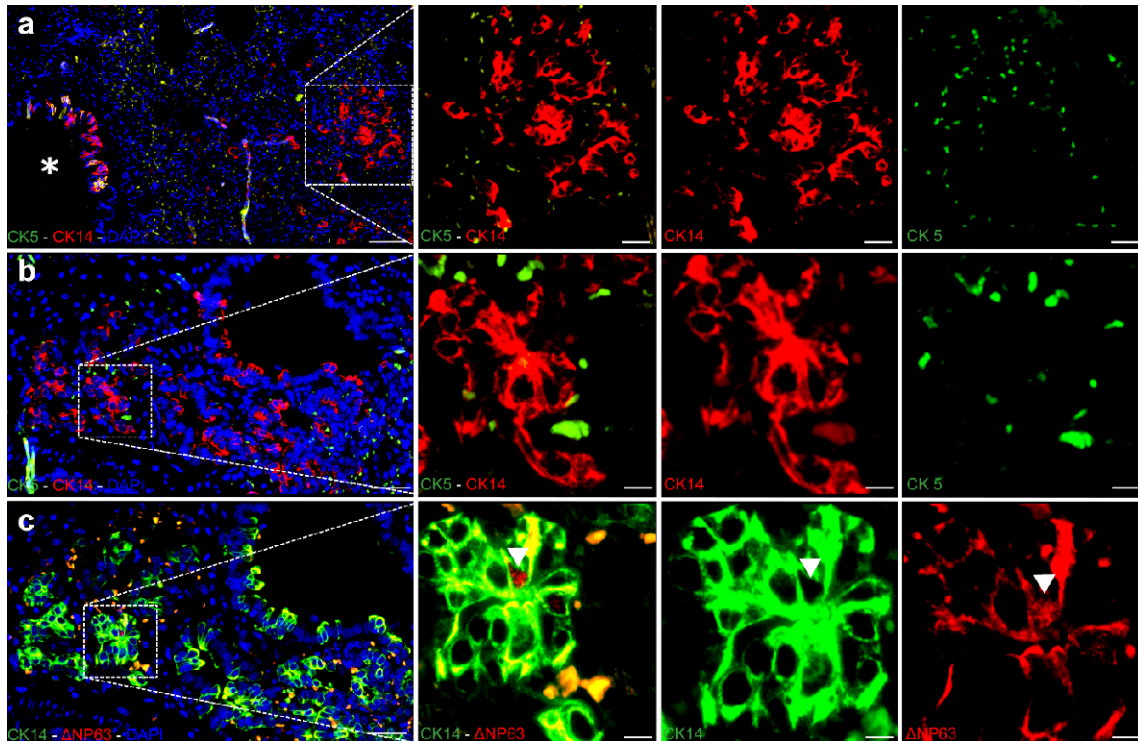

1375

1376

1377

**Supplementary figure 6: CK14<sup>+</sup> and CK14<sup>+</sup>ΔNP63<sup>+</sup> basal cells take part in alveolar proliferation in SARS-CoV-2 infected hamsters.**

1378

1379

1380

1381

1382

1383

1384

1385

1386

1387

1388

1389

**A** Representative image of double immunofluorescence for CK5 (green) and CK14 (red) in a peribronchiolar proliferation area in a SARS-CoV-2 infected hamster at 6 dpi. An overview and higher magnification of the area delineated by a rectangle are shown. The asterisk indicates a bronchiole containing CK5<sup>+</sup>CK14<sup>+</sup> basal cells. Alveolar proliferation foci are composed of CK5<sup>-</sup>CK14<sup>+</sup> basal cells. **B, C** Representative images of double immunofluorescence for CK5 (green) and CK14 (red) as well as CK14 (green) and ΔNP63 (red), respectively. Pictures are taken from the same peribronchiolar proliferation area in a SARS-CoV-2 infected hamster at 6 dpi. Overviews and higher magnification of the area delineated by rectangles are shown. Alveolar proliferation foci are mainly composed of CK5<sup>-</sup>CK14<sup>+</sup>ΔNP63<sup>-</sup> and rare CK5<sup>-</sup>CK14<sup>+</sup>ΔNP63<sup>+</sup> basal cells (arrowhead). Scale bars: 50 μm (overviews), 25 μm (high magnifications in a), 10 μm (high magnifications in b, c).

1390

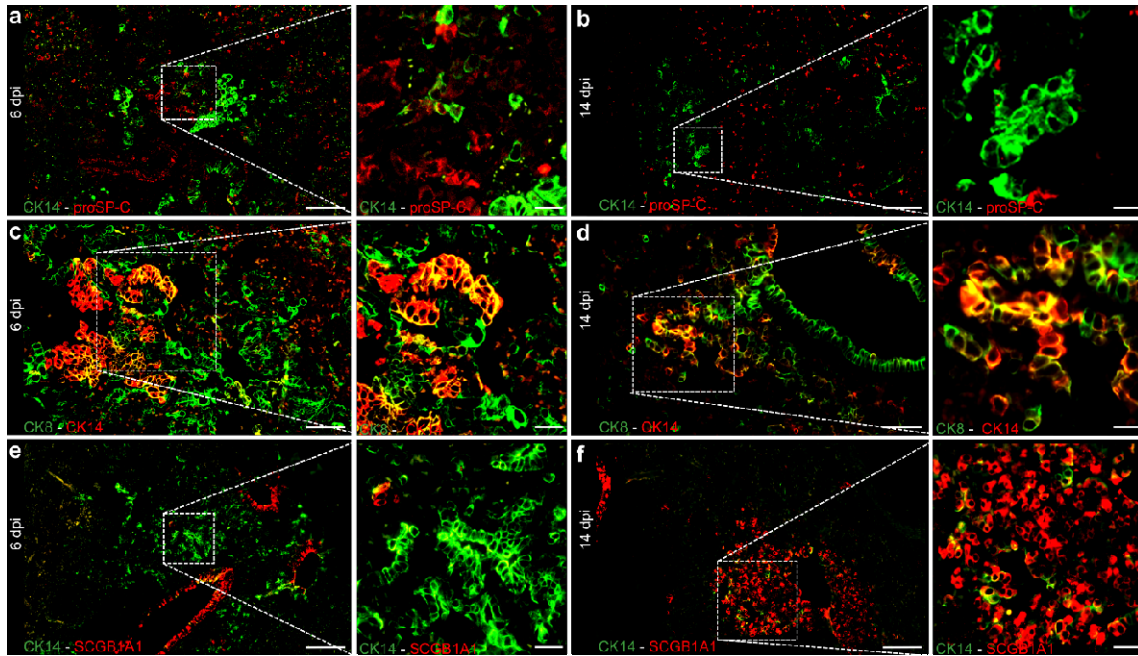

1391

1392 **Supplementary figure 7: Airway basal cells in alveolar proliferates of SARS-**  
1393 **CoV-2 infected hamsters at different time points.**

1394 **A, B** Representative images of double immunofluorescence for CK14 (green) and  
1395 proSP-C (red) in peribronchiolar proliferation areas in SARS-CoV-2 infected  
1396 hamsters at 6 and 14 dpi, respectively. An overview and higher magnification of the  
1397 areas delineated by rectangles are shown. **A** CK14<sup>+</sup> basal cells in the alveoli. Single  
1398 cells are CK14<sup>+</sup>proSP-C<sup>+</sup>, indicating that airway progenitors differentiate into proSP-  
1399 C<sup>+</sup> AT2 cells at 6 dpi. **B** CK14<sup>+</sup> basal cells populating the alveolar proliferation foci  
1400 without transdifferentiating in AT2 cells at 14 dpi. **C, D** Representative images of  
1401 double immunofluorescence for CK14 (red) and CK8 (green) in peribronchiolar  
1402 proliferation areas in SARS-CoV-2 infected hamsters at 6 and 14 dpi, respectively.  
1403 An overview and higher magnification of the area delineated by a rectangle are  
1404 shown. **C** Transition from CK14<sup>+</sup> airway basal cells forming a pod, to double labeled  
1405 CK14<sup>+</sup>CK8<sup>+</sup> cells differentiating into CK14<sup>-</sup>CK8<sup>+</sup>, elongated ADI cells at 6 dpi. **D**  
1406 CK14<sup>+</sup> cells with airway-like morphology, populating the alveolar proliferation foci  
1407 without transdifferentiating in elongated ADI cells at 14 dpi. **E, F** Representative  
1408 images of double immunofluorescence for CK14 (green) and SCGB1A1 (red) in  
1409 peribronchiolar proliferation areas in SARS-CoV-2 infected hamsters at 6 and 14 dpi,  
1410 respectively. An overview and higher magnification of the area delineated by a  
1411 rectangle are shown. **E** CK14<sup>+</sup> cells populating the alveolar proliferatio foci  
1412 without transdifferentiating in SCGB1A1<sup>+</sup> club cells at 6 dpi. **F** CK14<sup>+</sup> basal cells in the  
1413 alveoli. Numerous cells are CK14<sup>+</sup>SCGB1A1<sup>+</sup> indicating that airway progenitors  
1414 differentiate into SCGB1A1<sup>+</sup> club cells at 14 dpi. Scale bars: 50  $\mu$ m (overviews), 25  
1415  $\mu$ m (high magnifications).
